## Offspring production of ovarian organoids derived from spermatogonial stem cells by chromatin reorganization

Huacheng Luo<sup>1#</sup>, Xiaoyong Li<sup>1#</sup>, Geng G. Tian<sup>1#</sup>, Dali Li<sup>2</sup>, Changliang Hou<sup>1</sup>, Xinbao Ding<sup>1</sup>, Lin Hou<sup>1</sup>, Qifeng Lyu<sup>3</sup>, Yunze Yang<sup>1</sup>, Austin J. Cooney<sup>4</sup>, Wenhai Xie<sup>1</sup>, Ji Xiong<sup>1</sup>, Hu Wang<sup>1</sup>, Xiaodong Zhao<sup>5\*</sup>, Ji Wu<sup>1, 6, 7\*</sup>

<sup>1</sup>Renji Hospital, Key Laboratory for the Genetics of Developmental & Neuropsychiatric Disorders (Ministry of Education), Bio-X Institutes, School of Medicine, Shanghai Jiao Tong University, Shanghai 200032, China

<sup>2</sup>Shanghai Key Laboratory of Regulatory Biology, Institute of Biomedical Sciences and School of Life Sciences, East China Normal University, Shanghai, 200241, China.

<sup>3</sup>Shanghai Ninth People's Hospital Affiliated Shanghai Jiao Tong University School of Medicine, Shanghai Jiao Tong University, Shanghai, 200240, China

<sup>4</sup>Department of Molecular and Cellular Biology, Baylor College of Medicine, Houston, TX 77030, USA

<sup>5</sup>Shanghai Center for Systems Biomedicine, Shanghai Jiao Tong University, Shanghai 200240, China

<sup>6</sup>Key Laboratory of Fertility Preservation and Maintenance of Ministry of Education, Ningxia Medical University, Yinchuan 750004, China.

<sup>7</sup>Lead Contact

#These authors contributed equally to this work.

Correspondence: [jiwu@sjtu.edu.cn](mailto:jiwu@sjtu.edu.cn) or [xiaodongzhao@sjtu.edu.cn](mailto:xiaodongzhao@sjtu.edu.cn)

1

## 2 **Abstract**

3 Fate determination of germline stem cells remains poorly understood at the chromatin  
4 structure level<sup>1,2</sup>. Here, we demonstrate successful production of offspring from  
5 oocytes transdifferentiated from mouse spermatogonial stem cells (SSCs) with  
6 tracking of transplanted SSCs in vivo, single cell whole exome sequencing, and in 3D  
7 cell culture reconstitution of the process of oogenesis derived from SSCs.  
8 Furthermore, we demonstrate direct induction of germline stem cells (iGSCs)  
9 differentiated into functional oocytes by transduction of *H19*, *Stella*, and *Zfp57* and  
10 inactivation of *Plzf* in SSCs after screening with ovarian organoids. Using high  
11 throughput chromosome conformation, we uncovered extensive chromatin  
12 reorganization during SSC conversion into iGSCs, which was highly similar to female  
13 germline stem cells. We observed that although topologically associating domains  
14 were stable during SSC conversion, chromatin interactions changed in a striking  
15 manner, altering 35% of inactive and active chromosomal compartments throughout  
16 the genome. These findings have important implications in various areas including  
17 mammalian gametogenesis, genetic and epigenetic reprogramming, biotechnology,  
18 and medicine.

19

## 20 **Main**

21 Cell fate decisions, which require key gene regulation, remain poorly understood at  
22 the chromatin structure level. Although three-dimensional chromatin architectures of  
23 mouse gametes were recently reported, how they affect fate decisions of germline  
24 stem cells remains to be explored<sup>1-3</sup>.

25 To characterize spermatogonial stem cells (SSCs), we firstly isolated by  
26 magnetic activated cell sorting (MACS) using an anti-Thy-1 antibody after two step  
27 enzymatic digestion of the testes from 6-day-old *pou5f1* (also known as Oct4, a germ  
28 cell-specific transcriptional factor)/GFP transgenic×C57BL/6 F1 hybrid mice<sup>4</sup>. Then,  
29 the isolated SSCs were purified for GFP-positive SSCs by fluorescence-activated cell  
30 sorting (FACS) (Extended Data Fig. 1a). The purified SSCs were maintained on SIM  
31 mouse embryo derived thioguanine- and ouabain- resistant (STO) feeder layers (see  
32 METHODS) (Extended Data Fig. 1b). After 3–5 days of culture, SSCs expanded into  
33 clusters (Extended Data Fig. 1c). Next, we determined the expression patterns of *Oct4*,

1 *Mvh* (mouse vasa homologue, expressed exclusively in germ cells), *c-Ret*<sup>5</sup>, *Plzf*<sup>6</sup>,  
2 *Rex-1*<sup>7</sup>, *Utf1*<sup>8</sup>, *Esg-1* (also known as *DPPA5*)<sup>9</sup>, *Stra8*<sup>10</sup>, *Sox2*<sup>11</sup>, and *Nanog*<sup>12</sup>. Reverse  
3 transcription-polymerase chain reaction (RT-PCR) and immunocytochemical analyses  
4 showed that SSCs expressed *Oct4*, *Mvh*, *c-Ret*, *Plzf*, *Rex-1*, *Utf1*, *Esg-1*, and *Stra8*.  
5 Cytogenetic analysis by treatment with colchicines followed by G-band staining  
6 demonstrated a normal karyotype (40, XY) in the metaphase spreads of examined  
7 SSCs (Extended Data Fig. 1d–j). To verify the characterization of SSCs, we compared  
8 the global expression profiles of SSCs and embryonic stem cells (ESCs) using  
9 microarrays. Gene expression profiles by scatter plots showed a significant difference  
10 between SSCs and ESCs (Extended Data Fig. 1k, n=3). More than two thousand  
11 genes (2251) were differentially expressed between SSCs and ESCs, including  
12 pluripotency-related genes *Dppa4*, *Fgf4*, *Nanog*, *Sox2*, and *Klf4* (Extended Data Fig.  
13 1k, l, fold change>2, P<0.05, t-test) and SSC-related genes *Zbtb16*(or *Plzf*), *Gfra1*,  
14 *Tex18*, *Piwil2*, and *Dazl* (Extended Data Fig. 1k, l, fold change>2, P<0.05, t-test).  
15 Therefore, these results demonstrated that SSCs had their apparent original property  
16 rather than a pluripotent identity. To determine the imprinting pattern of SSCs,  
17 differentially methylated regions (DMRs) of two paternal (*H19* and *Rasgrf1*) and two  
18 maternal (*Igf2r* and *Peg 10*) imprinted regions were examined in SSCs and ESCs by  
19 bisulfite genomic sequencing. In SSCs, paternally imprinted regions (Extended Data  
20 Fig. 1m, o) were methylated, while maternally imprinted regions were not methylated  
21 (Extended Data Fig. 1n, p); this indicated an androgenetic imprinting pattern that was  
22 different from that of ESCs.

23 For investigating SSC fate determination in the mouse ovary, *pou5f1*/GFP  
24 transgenic mouse SSCs cultured for 3–5 days were directly transplanted into the  
25 ovaries of premature ovarian failure (POF) mice (see METHODS). Phosphate  
26 buffered saline (PBS) was injected into the ovaries of POF recipients as a control. For  
27 the positive control, female germline stem cells (FGSCs) from *pou5f1*/GFP transgenic  
28 mice were also transplanted into the ovaries of POF mice (see METHODS). At 8  
29 weeks post-transplantation, recipient ovaries including positive control ovaries were  
30 collected and evaluated for morphology and GFP expression. Histological analysis  
31 showed that recipient ovaries injected with cells contained numerous oocytes at all  
32 stages of development, including GFP-positive oocytes (Fig. 1a I, III, IV and

1 Extended Data Fig. 2a-e). Furthermore, DNA fluorescence in situ hybridization (FISH)  
2 analysis showed the presence of the *Sry* gene in oocytes from recipient ovaries (Fig.  
3 1b). For confirmation, single cell whole exon sequencing was used. The results  
4 demonstrated that the germinal vesicle (GV) oocytes from recipient ovaries were  
5 derived from transplanted SSCs (Fig. 1c). Mature oocytes from recipient ovaries were  
6 then collected for karyotype analysis. The results showed that some mature oocytes  
7 had the karyotype of 20, Y (Fig. 1d I–V). PCR analysis of DNA fragment *Sry*  
8 confirmed that some mature oocytes contained a candidate of the Y chromosome (Fig.  
9 1d VI). However, control ovaries consisted of stromal and interstitial cells as well as  
10 atretic follicles (Fig. 1a II). These results indicate that XY oocytes were regenerated in  
11 POF females by transplantation of SSCs.

12 To examine whether XY oocytes derived from SSCs could produce offspring,  
13 POF recipients were mated with wild-type C57BL/6 adult males at 35 days after cell  
14 transplantation or PBS injection (control)<sup>13,14</sup>. Control recipients were not fertile ( $n =$   
15 9). All POF recipients produced offspring ( $n=8$ , Fig. 1e I) with more males than  
16 females per litter (male:female, 1.95:1.00). One hundred and sixteen of the 130  
17 offspring were alive with a normal phenotype as well as fertile. Fourteen of the 130  
18 offspring died at 1–6 weeks after birth. The offspring were examined for the presence  
19 of GFP transgenes by Southern blot analyses (Fig. 1e II). Sixty-four of the 130 F1  
20 progeny were heterozygous for the GFP transgene. Furthermore, simple sequence  
21 length polymorphism (SSLP) analysis was performed with SSLP markers to confirm  
22 that the offspring were derived from transplanted SSCs. The offspring from eight  
23 recipients (see above) were distinct from POF (see METHODS) or C57BL/6  
24 mice-their parents (POF mice and mated male); however, they had exactly the same  
25 profiles as the SSCs from which they were derived (Fig. 1f). After analysis of the  
26 methylation status, five of the 20 offspring demonstrated abnormal methylation  
27 patterns. Two offspring that did not survive showed high methylation in *Peg 10* with  
28 an increase of  $21.46\% \pm 2.66\%$  and  $28.16\% \pm 2.87\%$  compared with the control. The  
29 remaining three demonstrated that *H19* was highly methylated and increased by  
30  $16.66\% \pm 1.48\%$  and  $14.23\% \pm 1.38\%$  or had low methylation with a decrease of

1 14.94%±1.26% compared with the control. Moreover, five out of six positive controls  
2 (see METHODS) with FGSC transplantation were fertile with approximately equal  
3 numbers of males and females per litter (male:female, 1.02:1.00), and their offspring  
4 showed no abnormal phenotype. Fifty of the 101 offspring were heterozygous for the  
5 GFP transgene (Extended Data Fig. 2f, g). Although approximately 11% of the  
6 offspring were abnormal, these results suggest that the XY oocytes derived from SSCs  
7 can produce offspring in previously sterile recipients and generate transgenic progeny.  
8 Control adult mice that received PBS injections into their ovaries did not produce  
9 transgenic offspring.

10 For understand how the SSCs transdifferentiated into oocytes in recipient ovaries,  
11 *pou5f1*/GFP transgenic mouse SSCs cultured for 3 days were directly transplanted  
12 into the ovaries of POF mice, and then monitored by confocal laser scanning  
13 microscopy. At 2 hours after SSC transplantation, the SSCs were observed in ovaries  
14 of recipient mice, indicating that the SSCs had been successfully transplanted into the  
15 mouse ovary (Fig. 2a). The transplanted cells were found to migrate toward the edge  
16 of the ovarian cortex at 2 days post-transplantation (Fig. 2a). At 3 days after  
17 transplantation, the cells continuously migrated toward the edge of the ovarian cortex  
18 and some of them reached the edge (Fig. 2a). When the transplanted cells had been in  
19 the ovary for 4 days, all of them had migrated into the edge of the ovarian cortex (Fig.  
20 2a). Five days post-transplantation, transplanted cells settled in the edge of the ovarian  
21 cortex and began to transdifferentiate into early primary oocytes (Fig. 2a, b). At 6–15  
22 days after transplantation, the transplanted cells continued to transdifferentiate into  
23 oocytes at various stages of development (Fig. 2a). This was confirmed by dual  
24 immunofluorescence analysis of the expression of MVH and GFP in transplanted cells  
25 (Fig. 2c).

26 To explore the mechanism of SSC fate determination when the SSCs were  
27 transplanted into the recipient ovary, we performed bisulfite sequencing to analyze the  
28 methylation status of these transplanted cells, mainly the differentially methylated  
29 regions (DMRs) of paternally imprinted gene *H19* and maternally imprinted gene  
30 *Peg10*. It is noteworthy that no obvious change of methylation levels, including the

1 maternally or paternally imprinting gene, was observed at 2 hours after SSC  
2 transplantation (Extended Data Fig. 3a–d). At 3–4 days after transplantation,  
3 methylation levels of *H19* were reduced gradually to 68.3% and 60.8%, with a further  
4 reduction to 37.9% and 23.8% at 5–6 days, suggesting that the bulk of methylation  
5 erasure occurred at 5–6 days. The low levels of methylation were present at 9 days  
6 and persisted to 15 days (Extended Data Fig. 3a, c). In contrast, the maternally  
7 imprinted gene *Peg10* showed evidence of robust de novo methylation with an  
8 increase to 45.7% methylation at 3 days and further increase to 78% methylation at 6  
9 day, indicating that the bulk of methylation establishment occurred at 6 days. The high  
10 methylation levels were maintained from 9 to 15 days (Extended Data Fig. 3b, d).  
11 These results suggested that the maternal DNA methylation pattern was directly  
12 constructed during SSC development in recipient ovaries, and that the SSCs did not  
13 dedifferentiate into PGCs.

14 Furthermore, we determined expression patterns of imprinted genes (*H19*, *Grb10*,  
15 *Gtl2*, *Rasgrf1*, *Peg10*, *Igf2r*, and *Snrpn*) and important transcription factor genes (*Plzf*,  
16 *Stella* or *Dppa3*, *Zfp42*, *Zfp57*, and *Nanos2*) during transdifferentiation of the  
17 transplanted cells into oocytes in recipient ovaries based on data from our previous  
18 studies<sup>15,16</sup>. After comparing the expression of imprinted genes in the cultured SSCs (0  
19 hour) and transplanted SSCs at 2 hours to 15 days post-transplantation, we observed  
20 that paternally imprinted genes (*H19*, *Grb10*, *Rasgrf1*, and *Gtl2*) and transcription  
21 factor genes (*Stella* and *ZFP57*) were gradually upregulated, especially at 3 and 6  
22 days with a further increase from 9 to 15 days (Extended Data Fig. 3e). In contrast,  
23 along with transdifferentiation into oocytes of the SSCs in recipient ovaries, the  
24 expression levels of these maternally imprinted genes (*Peg 10*, *Igf2r*, and *Snrpn*) and  
25 transcription factor genes (*Plzf*, *Zfp42*, and *Nanos2*) underwent obvious reductions at  
26 5–6 days with a continuous decrease from 9 to 15 days after transplantation (Extended  
27 Data Fig. 3e), suggesting establishment of the maternal imprinting pattern.

28 Based on the above results, we further screened for the critical imprinted genes  
29 and transcription factor genes required for SSC conversion. The spatial organization  
30 of the mammal genome is known to play an important role in the regulation of gene

1 expression<sup>17</sup>. Therefore, we used in situ high throughput chromosome conformation  
2 capture (Hi-C) to further screen for the critical genes and found 6.28 billion unique  
3 read pairs in SSCs and FGSCs. The compartment status was divided into two groups,  
4 compartment A and B. By comparing A/B compartment statuses and chromatin loops  
5 between SSCs and FGSCs (Extended Data Fig. 4, Supplementary Table 1-3), we  
6 established combinations of six genes (6Gs), including imprinted genes, *H19* and  
7 *Rasgrf1*, and transcription factor genes *Stella*, *Zfp57*, *Zfp42*, and *Plzf*. After  
8 overexpressing *Stella*, *H19*, *Zfp57*, and *Rasgrf1* and knockdown of *Plzf* and *Zfp42* in  
9 SSCs, the cells converted to induced germline stem cells (or induction of germline  
10 stem cells, iGSCs) with a maternal imprinted pattern (Extended Data Fig. 5, Extended  
11 Data Fig. 6a) and formed ovarian organoids when three-dimensional (3D) co-cultured  
12 with somatic cells from the fetal ovary for 2 weeks, modifying the method previously  
13 described in ref<sup>18</sup> (Extended Data Fig. 6b I-II). Upon withdrawal of *Rasgrf1* from the  
14 6Gs, we found that the 3D co-cultured cells still formed ovarian organoids (Extended  
15 Data Fig. 6b III). For the remaining five genes (5Gs), removal of *Zfp42* further  
16 promoted the formation of the organoids (Extended Data Fig. 6b IV). However,  
17 removal of any factor from the four genes (4Gs, *Stella*, *H19*, *Zfp57*, and *Plzf*) led to  
18 the failure to form the organoids (Extended Data Fig. 6b V–VIII).

19 The morphology of iGSCs induced by the overexpression of *Stella*, *H19*, and  
20 *Zfp57* and the inactivation of *Plzf* was similar to that of FGSCs (Extended Data Fig.  
21 7a). Furthermore, the iGSCs expressed *Stella*, *Mvh*, *Fragilis*, *Dazl*, and *Oct4* with a  
22 maternal imprinted pattern (Extended Data Fig. 7a, b, Extended Data Fig. 6c). For  
23 confirmation, we performed genome-wide DNA methylation analysis in SSCs, iGSCs,  
24 and FGSCs by MeDIP-seq. A total of 38.7 million reads, yielding 467,163 DNA  
25 methylationsites (peaks) in three kinds of cell populations were generated. We  
26 observed widespread variation in terms of DNA methylation during SSC transition  
27 into iGSCs (Extended Data Fig. 7c). Subsequently, we performed pair-wise  
28 correlation analysis of the MeDIP data sets from SSCs, iGSCs, and FGSCs. We found  
29 that the overall DNA methylation pattern of iGSCs was similar to that of FGSCs ( $r =$   
30 0.79), but it was less similar to that of SSCs ( $r = 0.59$ ). Such a trend was evidenced

1 more clearly by individual regions of interest. For example, at the maternally  
2 imprinted region *Igf2r*, the DNA methylation signal was relatively low in the *Igf2r*  
3 promoter of SSCs. It increased remarkably and appeared to be almost at the same  
4 level in iGSCs and FGSCs (Extended Data Fig. 7c, d). A similar phenomenon was  
5 also observed at the promoter region of *Nr0b1*, the gene encoding the orphan nuclear  
6 receptor and required for development of male characteristics in mice<sup>19</sup>. These  
7 observations suggest that DNA methylation contributed to the SSC transition. Next,  
8 we compared global gene expression profiles among SSCs, iGSCs and FGSCs by  
9 RNA sequencing. A total of 380,702,626 raw reads were generated. We detected  
10 expression of 18229, 19755, and 18978 out of 24550 genes in SSCs, iGSCs, and  
11 FGSCs, respectively. On average, 77% of the known mouse genes were expressed in  
12 the sampled SSCs, iGSCs, and FGSCs. Hierarchical clustering was performed, and the  
13 results indicated that iGSCs were clustered with FGSCs, but separated from SSCs,  
14 suggesting that the global gene expression profile of iGSCs was similar to that of  
15 FGSCs (Extended Data Fig. 7e, f). Among these genes, *Igf2r*, a maternal imprinted  
16 gene, showed high expression in SSCs and low level expression in iGSCs and FGSCs  
17 (Extended Data Fig. 7f), which was consistent with the results from the analysis of  
18 genome-wide DNA methylation in SSCs, iGSCs, and FGSCs.

19 Hi-C interaction maps provide information on multiple hierarchical levels of  
20 genome organization<sup>20</sup>. To understand how genome organization is involved in SSCs  
21 transition to iGSCs, we also performed Hi-C experiments using two biological  
22 replicates of iGSCs, generating a total of 2.96 billion unique read pairs. The Hi-C data  
23 analysis showed the high order chromatin organization of the whole genome in SSCs,  
24 iGSCs, and FGSCs (Fig. 3a–c, Extended Data Fig. 9). To examine the characteristics  
25 of their chromatin organization, we analyzed the pattern of compartment A/B in SSCs,  
26 iGSCs, and FGSCs. We found a large degree of spatial plasticity in the arrangement of  
27 the A/B compartments or redistribution of the spatial organization of their genomes  
28 during SSC transition into iGSCs with 35% of the genome switching compartments.  
29 Furthermore, we found that the regions that changed their A/B compartment status  
30 corresponded to a single or series of topologically associated domains (TADs),



1 suggesting that TADs are the units of dynamic alterations in chromosome  
2 compartments (Fig. 3b). Interestingly, we observed that iGSCs and FGSCs were  
3 highly similar in their status of A/B compartments compared with SSCs (Fig. 3c). For  
4 SSC transition into iGSCs, genes that changed from compartment B to A tended to  
5 show higher expression, while genes that changed from A to B tended to show  
6 reduced expression (Fig. 3d). Moreover, we identified 4353 genes with co-variation  
7 between compartment switching and gene expression. For example, at the  
8 compartment B region, *Dppa3* expression was relatively low in SSCs. It increased  
9 remarkably and appeared to be almost at the same level in iGSCs and FGSCs when  
10 changing from compartment B to A (Fig. 3e). DNA methylation that changed from  
11 compartment B to A also tended to show a reduced signal, whereas DNA methylation  
12 that changed from A to B tended to show higher signal (Fig. 3f). Take together, these  
13 results demonstrate that, when SSCs convert to iGSCs, there is a high degree of  
14 plasticity in A and B compartments, corresponding changes in gene expression,  
15 indicating that the A and B compartments have a contributory to cell type-specific  
16 patterns of gene expression.

17       Developmental feature of ovarian organoids from FGSCs and iGSCs were  
18 explored. At 2 weeks of 3D co-culture with the germline stem cells and somatic cells  
19 from the fetal ovary, ovarian organoids were generated in FGSC and iGSC groups.  
20 The organoids were completely filled with follicles which possessed oocytes. In  
21 contrast, ovarian organoids were not formed in the SSC group. When the ovarian  
22 organoids were 3D co-cultured for 3 weeks, the follicles grew obviously (Fig. 4a).  
23 After these follicles were 3D cultured individually for 2 weeks (see METHODS), a  
24 large number of immature oocytes were obtained from the cultured follicles.  
25 Moreover, Oct4-EGFP cells were detectable in iGSC and FGSC groups at 3 days of  
26 3D co-culture. A number of EGFP-positive oocytes were observed in ovarian  
27 organoids after 3 weeks of 3D co-culture (Fig. 4a). After 2-3 weeks of 3D co-culture,  
28 however, the EGFP expression became weak (Fig. 4a).

29       For comparison between iGSC and FGSC groups, 905 immature oocytes from  
30 the iGSC group were obtained from 27 ovarian organoids in 8 cultures with

1 33.52±4.27 immature oocytes per organoid. In the FGSC group, 1140 immature  
2 oocytes were obtained from 36 ovarian organoids in 12 experiments with 31.67±3.86  
3 immature oocytes per organoid. No difference in immature oocytes per organoid was  
4 observed in both groups (Fig. 4b).

5 To evaluate oogenesis during the ovarian organoid development,  
6 immunofluorescence analysis of SCP3 and H2AX was performed. Furthermore, the  
7 gene expression profiles during iGSC or FGSC differentiation were analyzed by  
8 qRT-PCR. The results showed progression of meiotic prophase I from 7 to 21 days of  
9 the germ cell differentiation in both groups (Fig. 4c). The expression dynamics of  
10 genes involved in oogenesis were similar between both groups (Extended Data Fig.  
11 10).

12 After in vitro maturation for 17-20 hours, 48.9% and 51.3% of these immature  
13 oocytes reached mature oocytes in iGSC and FGSC groups, respectively. In addition,  
14 no difference in the number of mature oocytes was observed between the two groups  
15 (Fig. 4d, Extended Data Fig. 11a).

16 To determine whether these mature oocytes could develop into offspring  
17 following in vitro fertilization, embryo culture and transfer into pseudopregnant ICR  
18 females were performed. The fertilization rate of the iGSC group (47.2%) was similar  
19 to that of the FGSC group (49.9%). Subsequently, these zygotes developed to 2-cell  
20 embryos (Fig. 4e, Extended Data Fig. 11b). After the embryo transfer, 53  
21 (male:female, 1.65:1.00) out of 342 (for iGSC group) or 51 (male:female, 1.13:1.00)  
22 out of 355 (for FGSC group) were delivered as viable offspring with colored eyes (Fig.  
23 4f, Extended Data Fig. 11c), indicating that the offspring were derived from C57BL/6  
24 iGSC- or FGSC-derived oocytes, but not ICR oocytes among gonadal somatic cells.  
25 The offspring were confirmed for the presence of GFP transgenes by Southern blot  
26 analysis, and live imaging by a Lumazine imaging system (Fig. 4g, h). All of the  
27 obtained offspring grew up normally and were fertile with no difference between the  
28 two groups. After analysis of the methylation status, 10 offspring per group  
29 demonstrated no observably abnormal methylation patterns (Extended Data Table 1).  
30 Our findings provide a new strategy to investigate stem cell biology, biotechnology,

1 and medicine.

2

- 3 1. Battulin, N. *et al.* Comparison of the three-dimensional organization of sperm and fibroblast  
4 genomes using the Hi-C approach. *Genome Biol***16**, 77 (2015).
- 5 2. Jung, Y. H. *et al.* Chromatin States in Mouse Sperm Correlate with Embryonic and Adult Regulatory  
6 Landscapes. *Cell Rep***18**, 1366-1382 (2017).
- 7 3. Ke, Y. *et al.* 3D Chromatin Structures of Mature Gametes and Structural Reprogramming during  
8 Mammalian Embryogenesis. *Cell***170**, 367-381 e320 (2017).
- 9 4. Yoshimizu, T. *et al.* Germline-specific expression of the Oct-4/green fluorescent protein (GFP)  
10 transgene in mice. *Dev Growth Differ***41**, 675-684 (1999).
- 11 5. Naughton, C. K., Jain, S., Strickland, A. M., Gupta, A. & Milbrandt, J. Glial cell-line derived  
12 neurotrophic factor-mediated RET signaling regulates spermatogonial stem cell fate. *Biol Reprod***74**,  
13 314-321 (2006).
- 14 6. Costoya, J. A. *et al.* Essential role of Plzf in maintenance of spermatogonial stem cells. *Nat Genet***36**,  
15 653-659 (2004).
- 16 7. Xu, J., Sylvester, R., Tighe, A. P., Chen, S. & Gudas, L. J. Transcriptional activation of the  
17 suppressor of cytokine signaling-3 (SOCS-3) gene via STAT3 is increased in F9 REX1 (ZFP-42)  
18 knockout teratocarcinoma stem cells relative to wild-type cells. *J Mol Biol***377**, 28-46 (2008).
- 19 8. Okuda, A. *et al.* UTF1, a novel transcriptional coactivator expressed in pluripotent embryonic stem  
20 cells and extra-embryonic cells. *EMBO J***17**, 2019-2032 (1998).
- 21 9. Tanaka, T. S. *et al.* Gene expression profiling of embryo-derived stem cells reveals candidate genes  
22 associated with pluripotency and lineage specificity. *Genome Res***12**, 1921-1928 (2002).
- 23 10. Oulad-Abdelghani, M. *et al.* Characterization of a premeiotic germ cell-specific cytoplasmic  
24 protein encoded by Stra8, a novel retinoic acid-responsive gene. *J Cell Biol***135**, 469-477 (1996).
- 25 11. Fong, H., Hohenstein, K. A. & Donovan, P. J. Regulation of self-renewal and pluripotency by Sox2  
26 in human embryonic stem cells. *Stem Cells***26**, 1931-1938 (2008).
- 27 12. Chambers, I. *et al.* Functional expression cloning of Nanog, a pluripotency sustaining factor in  
28 embryonic stem cells. *Cell***113**, 643-655 (2003).
- 29 13. Zou, K. *et al.* Production of offspring from a germline stem cell line derived from neonatal ovaries.  
30 *Nat Cell Biol***11**, 631-636 (2009).
- 31 14. Wu, C. *et al.* Tracing and Characterizing the Development of Transplanted Female Germline Stem  
32 Cells In Vivo. *Mol Ther***25**, 1408-1419 (2017).
- 33 15. Xie, W., Wang, H. & Wu, J. Similar morphological and molecular signatures shared by female and  
34 male germline stem cells. *Sci Rep***4**, 5580 (2014).
- 35 16. Li, X., Tian, G. G., Zhao, Y. & Wu, J. Genome-wide identification and characterization of long  
36 noncoding and circular RNAs in germline stem cells. *Sci Data***6**, 8 (2019).
- 37 17. Gorkin, D. U., Leung, D. & Ren, B. The 3D genome in transcriptional regulation and pluripotency.  
38 *Cell Stem Cell***14**, 762-775 (2014).
- 39 18. Hikabe, O. *et al.* Reconstitution in vitro of the entire cycle of the mouse female germ line.  
40 *Nature***539**, 299-303 (2016).
- 41 19. Zhang, X. L. *et al.* Integrative epigenomic analysis reveals unique epigenetic signatures involved in  
42 unipotency of mouse female germline stem cells. *Genome Biol***17**, 162 (2016).
- 43 20. Lieberman-Aiden, E. *et al.* Comprehensive mapping of long-range interactions reveals folding

1 principles of the human genome. *Science* **326**, 289-293 (2009).

2

### 3 **METHODS**

4 **Mice.** C57BL/6, pou5f1-GFP transgenic mice [CBA-Tg (pou5f1-EGFP) 2Mnn] (The  
5 Jackson Laboratory) or pou5f1/GFP transgenic mice<sup>21</sup>×C57BL/6 F1 hybrid mice were  
6 used in this study. Premature ovarian failure (POF) *Pten* (phosphatase and tensin  
7 homolog deleted on chromosome 10)<sup>loxp/loxp</sup>; *Gdf9-Cre* (*Gdf9* promoter-mediated Cre  
8 recombinase<sup>+</sup>) mice were produced and genotyped as described by Reddy *et al*<sup>22,23</sup>.  
9 POF (*Pten*<sup>loxp/loxp</sup>; *Gdf9-Cre*<sup>+</sup>) mice were used as recipients. *Pten*<sup>loxp/loxp</sup> mice  
10 (B6.129S4-*Pten*<sup>tm1Hwu</sup>) and *Gdf9-Cre* [Tg (*Gdf9-iCre*)] mice were purchased from  
11 The Jackson Laboratory. Animal experimentation was approved by the Institutional  
12 Animal Care and Use Committee of Shanghai and performed in accordance with the  
13 National Research Council Guide for Care and Use of Laboratory Animals.

14 **Isolation and culture of spermatogonial stem cells.** Testes from 6-day-old  
15 pou5f1-GFP transgenic mice or pou5f1/GFP transgenic mice×C57BL/6 F1 hybrid  
16 mice were collected and decapsulated. Spermatogonial stem cells (SSCs) were  
17 isolated using methods described by Wu *et al*<sup>24,25</sup> and Yuan *et al*<sup>26</sup>. The SSCs were  
18 purified by both magnetic activated cell sorting (MACS) with an anti-Thy-1 antibody  
19 and fluorescence activated cell sorting (FACS), according to the manufacturers'  
20 instructions. SSCs were cultured on mitotically inactivated SIM mouse embryo  
21 derived thioguanine- and ouabain- resistant (STO) feeder cells ( $5 \times 10^4$  cells/cm<sup>2</sup>;  
22 ATCC) in culture medium. For mitotic inactivation, STO cells were treated with 10  
23 µg/ml mitomycin C (Sigma) for 2–3 hours. Mitomycin C-treated STO cells were  
24 washed with phosphate buffered saline (PBS) and transferred to 0.2% (w/v)  
25 gelatin-coated tissue culture plates. The SSC culture medium consisted of high  
26 glucose Dulbecco's modified Eagle's medium (DMEM; Life Technologies)  
27 supplemented with 10% fetal bovine serum (FBS; GIBCO), 2 mM L-glutamine  
28 (Sigma), 0.1 mM β-mercaptoethanol (Sigma), 1 mM nonessential amino acids (Life  
29 Technologies), 10 ng/ml glial cell line-derived neurotrophic factor (GDNF; R&D  
30 Systems), 10 ng/ml leukemia inhibitory factor (LIF; Chemicon), and 15 mg/l

1 penicillin (Sigma). SSCs were cultured on STO feeders in 24-well plates with 500  $\mu$ l  
2 culture medium per well. The medium was replaced every 1–2 days, and cells were  
3 subcultured at a split ratio of 1:1–3 by trypsinization every 3 days. All cultures were  
4 maintained at 37°C with 5% CO<sub>2</sub>.

5 **Isolation and purification of female germline stem cells.** Ovaries were collected  
6 from 5-day-old pou5f1/GFP transgenic mice  $\times$ C57BL/6 F1 hybrid mice. Female  
7 germline stem cells (FGSCs) were isolated and purified using a method described  
8 elsewhere<sup>27</sup>. Briefly, dissected ovarian tissues were incubated in 1 mg/ml collagenase  
9 (type IV; Sigma) at 37°C with gentle agitation for 15–20 min. After washing, ovarian  
10 tissues were incubated in 0.05% trypsin and 1 mM EDTA at 37°C for 5–7 min. Sheep  
11 anti-mouse IgG magnetic beads (DynaL Biotech) were incubated with an anti-fragilis  
12 antibody (Abcam) for 30 min at room temperature. The magnetic bead/antibody  
13 mixture was incubated with the isolated cell suspension for another 30 min at room  
14 temperature. Then, the mixture of cells and magnetic beads was placed on a magnetic  
15 bead separator for 2–3 min, and the supernatant was removed. The fraction on the  
16 inner side of the eppendorf tube was collected and rinsed twice with PBS,  
17 resuspended in PBS, and further purified by FACS, in accordance with the  
18 manufacturers' instructions. The purified FGSCs were placed in FGSC culture  
19 medium<sup>27</sup> and cultured on mitotically inactivated STO feeder cells in 24-well plates at  
20 37°C with 5% CO<sub>2</sub>.

21 **Preparation of ovarian tissue for analysis.** Ovaries from recipient and control mice  
22 were fixed with 4% (w/v) paraformaldehyde (4°C, overnight) and dehydrated via a  
23 graded ethanol series. The tissues were vitrified in xylene, embedded in paraffin,  
24 sectioned (6  $\mu$ m thickness), and then mounted on slides. Prior to immunofluorescence  
25 staining, the sections were dewaxed in xylene and rehydrated via a graded ethanol  
26 series. Sections were counterstained with hematoxylin.

27 **Immunofluorescence.** After equilibration in PBS, tissue sections were digested with  
28 0.125% trypsin for 10 min at 37°C and then washed in PBS twice. The sections were  
29 blocked in 10% goat serum at room temperature for 10 min and then incubated  
30 overnight at 4°C with appropriate primary antibodies. The primary antibodies used  
31 were mouse monoclonal anti-GFP (1:200 dilution; Abcam) and rabbit polyclonal

1 anti-MVH (1:200; Abcam). After washing in PBS, the sections were incubated at  
2 37°C for 30 min with TRITC-conjugated goat anti-rabbit IgG (1:200; Sino-American  
3 Biotechnology Co.) or fluorescein isothiocyanate (FITC)-conjugated goat anti-mouse  
4 IgG (1:200; Sino-American Biotechnology Co.) as appropriate. Sections were stained  
5 with 4',6-diamidino-2-phenylindole (DAPI, 1:1000) at 37°C for 20 min, covered with  
6 mounting medium (glycerol:PBS, 3:1), and viewed under a Nikon Eclipse E600  
7 microscope equipped with a Nikon Dxm 1200 digital camera using fluorescein optics  
8 for TRITC and FITC, and ultraviolet optics for DAPI or under a confocal microscope  
9 (FluoView™ FV1000).

10 Cultured germline stem cells were fixed with 4% paraformaldehyde in PBS at room  
11 temperature for 20 min. After fixation, the cells were permeabilized with 0.5% Triton  
12 X-100 for 30 min at room temperature for PLZF staining. The cells were incubated in  
13 blocking solution (10% normal goat or bovine serum in PBS, 10 min, 37°C), followed  
14 by rinsing and overnight incubation at 4°C with appropriate primary antibodies: rabbit  
15 polyclonal anti-MVH (1:200; Abcam), mouse monoclonal anti-GFP (1:200; Abcam),  
16 and anti-PLZF (1:150, Santa Cruz Biotechnology). After washing in PBS, the cells  
17 were incubated with TRITC-conjugated goat anti-rabbit IgG (1:200) or fluorescein  
18 isothiocyanate (FITC)-conjugated goat anti-mouse IgG (1:150) at 37°C for 30 min,  
19 rinsed, and then incubated with DAPI (1:1000) at 37°C for 20 min. Petri dishes were  
20 then covered with mounting medium (glycerol:PBS, 3:1) and viewed as described  
21 above.

22 **Karyotypic analysis.** Karyotypic analysis was performed using standard protocols for  
23 mouse chromosome analysis. After culture for 3 days, SSCs were treated with culture  
24 medium containing colchicine (100 ng/ml; Sigma) for 3 hours, hypotonically treated  
25 with 75 mM KCl for 15 min at 37°C, immersed twice in methanol:acetic acid (3:1) for  
26 30 min at -30°C, dried in air for 3–4 days, digested with 0.025% trypsin, and then  
27 stained with Giemsa. To verify the chromosomal type of recipient mouse oocytes,  
28 karyotypic analysis of mature oocytes from recipients was performed as  
29 described previously<sup>28</sup>. To collect mature oocytes, recipient mice were superovulated  
30 with 10 IU pregnant mare serum gonadotropin (PMSG; ProSpec-Tany) for 48 hours,  
31 followed by 10 IU human chorionic gonadotropin (hCG; ProSpec-Tany). These

1 oocytes were hypotonically treated with 75 mM KCl at 37°C for 15 min and then  
2 fixed with two solutions consisting of methanol/acetic acid/water (5:1:2) for 5–10 min  
3 and methanol/acetic acid (3:1) for 15 min at room temperature. Fixed cells were  
4 mounted on slides and immediately exposed to steam from boiling water (90–100°C)  
5 for 30 sec to cause expansion of the cells, followed by drying at 37°C and Giemsa  
6 staining (Amresco)<sup>28</sup>.

7 **Embryonic stem cell culture.** Embryonic stem cells (ESCs) were cultured with  
8 mouse embryonic fibroblasts in the presence of leukemia inhibitory factor (LIF; 1000  
9 U/ml) in Glasgow modification of Eagle’s medium (GMEM; Invitrogen) containing  
10 10% fetal calf serum. The medium was replaced every 1–2 days, and cells subcultured  
11 at a split ratio of 1:1–3 by trypsinization every 3 days. All cultures were maintained at  
12 37°C with 5% CO<sub>2</sub>.

13 **Microarrays.** Total RNA was extracted from cultured SSCs and ESCs using Trizol  
14 reagent (Invitrogen), in accordance with the manufacturer’s instructions. RNA was  
15 labeled using an Illumina labeling kit. An Illumina sentrix mouse WG-6 Beadchip  
16 (45281 transcripts) was used in this study. Microarray experiments, including RNA  
17 labeling, hybridization, washing, scanning, image analysis, normalization, and data  
18 processing, were performed by Shanghai Biotechnology Corporation using the  
19 Illumina manual. Three biological repeats were included in microarray experiments.  
20 Differentially expressed genes were identified by the Illumina system. The data were  
21 analyzed using GeneSpring GX 11 software. Hierarchical clustering of samples was  
22 performed by cluster 3.0 and TreeView software<sup>29</sup>.

23 **Transplantation.** For injection into the ovary, SSCs were collected and transplanted  
24 into the ovaries of POF mice. For the positive control, FGSCs from pou5f1/GFP  
25 transgenic mice were also transplanted into ovaries of POF mice. Recipient mice were  
26 anesthetized by injection of pentobarbital sodium (45 mg/kg). Approximately 6 µl of a  
27 singlecell suspension containing  $1 \times 10^4$  cells or 6 µl PBS for the control was  
28 microinjected into the ovaries of recipients as described elsewhere. In detail, after  
29 anesthetization of recipient mice for 20–30 min and disinfection of the abdominal  
30 surface using 75% ethanol, the recipient abdominal cavity was carefully opened. To  
31 expose and find the ovaries, the intestines were carefully moved away from the inside  
32 of the abdominal cavity. The Y-shaped uterus was located, and then following the

1 uterus and oviduct until posterior to the kidneys, the ovaries were located caudal to  
2 the kidneys in the lower abdominal cavity. By gently holding an ovary with forceps  
3 without causing damage, the ovary was injected at 1–2 sites using a glass pipette with  
4 a 45  $\mu\text{m}$  tip and mouth pipetting to carefully transplant the 6  $\mu\text{l}$  single cell suspension  
5 of  $\sim 1 \times 10^4$  SSCs or FGSCs into each ovary. At 35 days after transplantation,  
6 recipients were mated with 8-week-old male mice.

7 **Reverse transcription-polymerase chain reaction and Southern blotting.** Reverse  
8 transcription-polymerase chain reaction (RT-PCR), PCR, and Southern blotting were  
9 performed as described elsewhere. Twenty-five cycles of PCR were performed using  
10 Taq polymerase (Takara) with primer sets specific for each gene. The  
11 glyceraldehyde-3-phosphate dehydrogenase gene (*Gapdh*) was amplified in each  
12 sample as a loading control. PCR products were isolated, subcloned, and sequenced to  
13 confirm the gene sequence.

14 **Bisulfite genomic sequencing.** Genomic DNA was extracted from SSCs, transplanted  
15 SSCs, ESCs, induced germline stem cells (iGSCs), and FGSCs. For bisulfite  
16 sequencing analysis of methylation, 500 ng genomic DNA was processed using an EZ  
17 DNA Methylation-Gold Kit<sup>TM</sup> (ZYMO Research), in accordance with the  
18 manufacturer's instructions. The methylation status of imprinted genes was analyzed  
19 using specific primers (outside,  
20 5'-GTTTTTTTGGTTATTGAAT-TTAAAATTAGT-3' and  
21 5'-AAAAACCATTCGTAATAACACAAATACCTA-3', inside,  
22 5'-TTAGTGTGGTTTATTATAGGAAGGTATAGAAGT-3' and  
23 5'-TAAACCTAAAATACTCAAACTTTATCACAA-3' for *H19*; 5'-GTG TAG AAT  
24 ATG GGG TTG TTT TAT ATT G-3' and 5'-ATA ATA CAA CAA CAA CAA TAA  
25 CAA TC-3' for *Rasgrfl*; 5'-GTA AAG TGA TTG GTT TTG TAT TTT TAA GTG-3'  
26 and 5'-TTA ATT ACT CTC CTA CAA CTT TCC AAA TT-3' for *Peg10*; 5'-TTA GTG  
27 GGG TAT TTT TAT TTG TAT GG-3' and 5'-AAA TAT CCT AAA AAT ACA AAC  
28 TAC ACA A-3' for *Igf2r*; outside, 5'-TATGTAATATGATATAGTTTAGAAATTAG-3'  
29 and 5'-AATAAACCCAAATCTAAAATATTTTAATC-3', inside,  
30 5'-AATTTGTGTGATGTTTGTATTATTGG-3' and  
31 5'-ATAAAATACACTTTCACTACTAAAATCC-3' for *Snrpn*). PCR products were  
32 sequenced and CpG islands were analyzed.

33 **PCR amplification of lineage-specific microsatellite loci.** Genomic DNA was



1 extracted from mouse tail tips or donor SSCs. DNA samples from donor SSCs, female  
2 recipients, mated males, and their corresponding offspring were analyzed by simple  
3 sequence length polymorphism (SSLP). Sequences for the primer pairs were designed  
4 according to the Mouse Genome Informatics website  
5 (<http://www.informatics.jax.org/>). Amplification of lineage-specific microsatellite  
6 DNA was performed in accordance with a previously described procedure<sup>30</sup>. PCR  
7 products were separated and analyzed by 3% agarose gel electrophoresis (Bio-Rad)  
8 and visualized by ethidium bromide staining.

9 **Flow cytometry and cell sorting.** After MACS, the cells were suspended in PBS and  
10 subjected to flow cytometry to analyze and sort GFP-positive cells using a FACSAria  
11 II cell sorter equipped with BD software (Becton Dickinson).

12 **Quantitative reverse transcription-PCR analysis.** Total RNA from cells was  
13 isolated using Trizol reagent. Complementary DNA was synthesized from 2 µg total  
14 RNA using a High Capacity cDNA Reverse Transcription Kit (Invitrogen). Primers  
15 were designed using Primer Premier Software (Primer Premier 5.0). Primer details are  
16 listed in Supplementary Table 4. *Gapdh* was amplified in each sample as an internal  
17 control. The mRNA level of each gene was normalized to *Gapdh* expression. The  
18 specificity of all quantitative real-time PCRs (qPCRs) was verified by a single peak in  
19 the melting curve. qPCRs were performed with a 7500 real-time PCR amplification  
20 system using SYBR Green PCR master mix (Applied Biosystems, UK). The relative  
21 levels of transcripts were calculated using the  $\Delta\Delta CT$  method within the ABI 7500  
22 System Software (V2.0.4). All gene expression levels were normalized to the internal  
23 standard gene, *Gapdh*. The means and standard error were calculated from triplicate  
24 measurements. Significance was determined using the Student's *t*-test. A *P*-value of  
25 less than 0.05 was considered as significant, and a *P*-value of less than 0.01 was  
26 extremely significant.

27 **Single cell whole genome amplification and exome sequencing.** Single cell whole  
28 genome amplification was performed on lysed single cells using a recently developed  
29 method named multiple annealing and looping based amplification cycles  
30 (MALBAC)<sup>31</sup>. In brief, amplification was initiated by primers, each with a 27 fixed

1 and eight degenerate base hybridizing uniformly throughout the genome. Fragments  
2 with variable length at random starting positions were generated by polymerase  
3 extension for multiple cycles. All fragments were flanked by the 27 base-fixed  
4 sequence and their complementary sequences, and further amplified by PCR to about  
5 1  $\mu$ g for barcoded massively parallel sequencing on an Illumina HiSeq 2500  
6 sequencing platform.

7 **Sry DNA in situ hybridization.** We used a commercially available SRY DNA FISH  
8 kit (Mice SRY DNA biotin labelled POD and fluorescent FISH in situ hybridization  
9 double staining system, TBD Science), according to the manufacturer's instructions.  
10 Briefly, sections were dewaxed with a graded series of ethanol, quenched in 3%  $H_2O_2$   
11 for 10 min at room temperature, and then washed twice with PBS. The sections were  
12 covered with SRY reagent B for 10 min at 37°C. After washing with PBS, the sections  
13 were incubated in Tris buffered saline (TBS) for 20 min at 95–100°C (pH 8.9) and  
14 then rinsed three times with cold TBS (5 min per rinse) and once with 0.2 $\times$  saline  
15 sodium citrate (5 min per rinse) at 0 °C. The sections were incubated for 8 hours at  
16 37°C with SRY reagent A and then washed three times with 2 $\times$ saline sodium citrate at  
17 37°C (3 min per rinse), three times with 0.2 $\times$ saline sodium citrate (3 min per rinse) at  
18 37 °C, and three times with TBS (2 min per rinse) at 37°C. The sections were covered  
19 with SRY reagent C for 45 min at 37°C. After washing in PBS, the sections were  
20 incubated at 37°C for 120 min with a fluorescein isothiocyanate (FITC)-conjugated  
21 mouse anti-digoxin monoclonal antibody, then incubated at 37°C for 120 min with  
22 DAPI. Finally, the sections were mounted in anti-fade mounting medium. Images  
23 were obtained using a Leica DMI3000 B microscope and Leica DFC550 digital  
24 camera.

25 **In situ high throughput chromosome conformation capture library generation**  
26 **using a low amount of cells.** In situ high throughput chromosome conformation  
27 capture (Hi-C) assays were carried out according to the protocol with minor  
28 modifications<sup>32-34</sup>. Cells were fixed in a 1% final concentration of formaldehyde prior  
29 to 10 min incubation at room temperature. The reaction was quenched for 5 min by  
30 adding a 2.5 M glycine solution. Cells were pelleted twice (3000g, 4°C for 5 min),

1 resuspended in ice-cold Hi-C lysis buffer for at least 15 min, and then washed once  
2 with 100  $\mu$ l of 1 $\times$  NEBuffer 2. The supernatant was discarded, and 1 $\mu$ l of 5% sodium  
3 dodecyl sulfate (SDS) was added to the remaining 9  $\mu$ l solution. The pellet was gently  
4 mixed and incubated at 62°C for 10 min. After incubation, 9.5  $\mu$ l water and 2.5  $\mu$ l of  
5 10% Triton X-100 were added to quench the SDS, and then the solution was  
6 incubated at 37°C for 30 min. Chromatin digestion was performed with Dpn II  
7 restriction enzyme (NEB, R0543M) at 37°C overnight and then inactivated for 20 min  
8 at 65 °C. To fill the overhangs generated by the Dpn II restriction enzyme, a master  
9 mix of 3.75  $\mu$ l biotin-14-dATP (Life Technologies), 0.45  $\mu$ l of 10 mM  
10 dCTP/dGTP/dTTP mix, and 1 $\mu$ l of 5 U/ $\mu$ l large DNA Polymerase I (NEB, M0210L)  
11 were added, followed by incubation at 24°C for 4 hours. The above biotin-labelled  
12 products were ligated by adding a master mix of 66.3  $\mu$ l water, 12  $\mu$ l of 10 $\times$  NEB T4  
13 DNA ligase buffer, 10  $\mu$ l of 10% Triton X-100, 5 $\mu$ l of 10 mg/ml bovine serum albumin,  
14 and 2 $\mu$ l of 400 U/ml T4 DNA ligase, followed by incubation at 16°C for 20 hours and  
15 then inactivation at 75°C for 20 min. The samples were pelleted (3000g, 4°C for 5 min)  
16 and washed once with 100  $\mu$ l of 10 mM Tris buffer. To remove biotin from unligated  
17 DNA ends, a master mix of 40  $\mu$ l water, 5  $\mu$ l of 10 $\times$  NEBuffer 2.1, 0.125  $\mu$ l of 10 mM  
18 dATP/dGTP, and 5  $\mu$ l of 3,000 U/ml T4 DNA polymerase (NEB, M0203L) were  
19 added to the tube containing the DNA sample, followed by incubation at 20°C for 4  
20 hours. The samples were pelleted (3000g, 4°C for 5 min) and resuspended in 50  $\mu$ l of  
21 10 mM Tris buffer. To digest the proteins, 2  $\mu$ l of 20 mg/ml proteinase K (NEB,  
22 P8107S) was added, followed by incubation at 62°C for 18 hours and inactivation at  
23 75°C for 30 min. The DNA was sheared to an average size of 400 bp (Covaris, M220)  
24 to perform the End Repair/dA-Tailing and Adaptor Ligation (NEB, E7337A) with a  
25 KAPA Hyper Prep Kit (KAPA, kk8502) and then processed by 3  $\mu$ l of USER™  
26 Enzyme (NEB, M5505L) at 37°C for 15 min to open up the loop. Biotin-labeled  
27 ligation products were isolated using MyOneStreptavidin T1 Dynabeads (Life  
28 Technologies, 65601) and then resuspended in 20  $\mu$ l of 10 mM Tris buffer at 98°C for  
29 10 min, and the supernatant was transferred to a fresh PCR tube. Hi-C DNA was  
30 amplified using Index Primers set 1 (NEB, E7335S). The Hi-C libraries were purified

1 with AMPure XP beads (Beckman Coulter, A63881) and sequenced using an Illumina  
2 sequencing platform.

3 **Hi-C data processing, mapping, and ICE normalization.** For Hi-C pair-end raw  
4 data, we first trimmed the adaptor sequences and low quality reads with BBmap  
5 (version 38.16). Then, we used HiCPro (version 2.7)<sup>35</sup> to map, process, and perform  
6 iterative correction for normalization. Briefly, reads were independently aligned to the  
7 mouse reference genome (mm9) by the bowtie2 algorithm<sup>36</sup>. We discarded the uncut  
8 DNA reads, re-ligation reads, continuous reads, and PCR artifacts. We then used the  
9 unique mapped reads (MAPQ>10) to build the contact matrix. Valid read pairs were  
10 then binned at a specific resolution by dividing the genome into sequential bins of  
11 equal size. We generated the raw contact matrices at binning resolutions of 10, 20, 40,  
12 100, and 200 kb. ICE<sup>37</sup> normalization was applied to remove bias in the raw matrix,  
13 such as GC content, mappability, and effective fragment length in the Hi-C data.

14 **Validation of Hi-C data.** The data reproducibility was confirmed by calculating  
15 Pearson's correlation coefficient (PCC) between the two libraries. Briefly, the  
16 interaction frequency was generated for each pair of 40kb bins. For each possible  
17 interaction  $I_{ij}$  between two replicates, they were correlated by comparing each point  
18 interaction in the normalized interaction matrix. Considering that the interaction  
19 matrix was highly skewed toward proximal interactions, we restricted the correlation  
20 to a maximum distance of 2 Mb between points  $i$  and  $j$ . We used R to calculate  
21 Pearson's correlation between two duplicates.

22 **Contact probability  $p(s)$  calculation.**  $P(s)$  was calculated with normalized interaction  
23 matrices at a 40kb resolution, as described previously<sup>30</sup>.  $P(s)$  calculations only  
24 considered intra interactions. Briefly, we divided the genome into 40kb bins. For each  
25 distance separated by 40, 80, 120, and 160 kb, we counted the number of interactions  
26 at corresponding distances. Then, we divided the number of interactions in each bin  
27 by the total number of possible region reads as  $P(s)$ . Furthermore, we normalized the  
28 sum of  $P(s)$  over the range of distances as 1. We used LOWESS fitting to construct  
29 the curve (log-log axis).

30 **Identification of A and B compartments.** We used the R package (HiTC)<sup>38</sup> `pca.hic`

1 function to generate PC1 eigenvectors using 400kb normalized matrices with the  
2 following options: normPerExpected=TRUE, npc=1, for which a positive value  
3 indicated the A compartment, while a negative value indicated the B compartment. To  
4 investigate compartment switching, we defined switched bins only if PC1  
5 eigenvectors changed in the same direction for two replicates.

6 **Identification of concordant genes with an A/B compartment switch.** We used a  
7 previously described method with minor modifications to define genes with  
8 concordant changes in expression and compartment status<sup>39</sup>. Briefly, we calculated the  
9 covariance between the vector of the gene expression values (FPKM) and the vector  
10 of PC1 values for each gene across five cell types. The calculated covariance as a  
11 metric to quantitatively define “concordance” was used. We compared these observed  
12 covariance values with a random background distribution to calculate a P-value for  
13 the covariance for each gene. Then, we produced the background distribution by  
14 randomly shuffling the vector of FPKM for each gene and calculating the covariance  
15 between the PC1 values and random gene expression vector. A rank-based P-value  
16 could be calculated for observed covariance values with 1000 repeats for each gene.  
17 Concordant genes were defined as those with a P-value of <0.01.

18 **Direct induction of germline stem cells from SSCs.** Knockdowns of specific genes  
19 were accomplished by small interfering RNAs (siRNAs) targeting *Plzf* and *Eed*. The  
20 interfering fragment was inserted downstream of the U6 promoter in a lentiviral  
21 vector (pLKD-CMV-G&PR-U6-shRNA) by molecular biological methods. At least  
22 four independent siRNAs were screened for knockdown efficiency against each target  
23 and the best siRNA target was selected (target Seq: CCAGGCATCTGATGACAAT  
24 for *Plzf*; GCAACAGAGTAACCTTATA for *Eed*). For *Stella*, *Zfp57*, *H19*, and *Rasgrfl*  
25 overexpression, cDNAs of candidate genes were inserted into the EcoRI and BamHI  
26 restriction sites of the overexpression plasmid (pHBLV-CMVIE-ZsGreen-T2A-puro).  
27 Lentivirus particles were generated by cotransfection of knockdown or overexpression  
28 plasmids and lentivirus packaging plasmids into HEK293T cells using transgene  
29 reagent. Enhancing buffer was added to the medium after 12 hours of transfection.

1 Virus particles were harvested at 48 hours after transfection, and a standardized virus  
2 titer was obtained using HEK293T cells.  
3 For lentivirus infection,  $1 \times 10^4$  SSCs, which were passaged for 2-3 times, were seeded  
4 in the well of a 48-well plate pre-coated with laminin and incubated with a 1:1  
5 mixture of culture medium and lentivirus-concentrated solution (lentivirus titer:  
6  $1 \times 10^9$  TU/ml) containing 5  $\mu$ g/ml polybrene. After overnight infection, cells were  
7 re-plated onto puromycin-resistant STO feeder layers and cultured in SSC medium. At  
8 12 hours after re-plating, the SSCs were incubated with a 1:1 mixture of culture  
9 medium and lentivirus-concentrated solution again. After overnight infection, the  
10 mixture was changed to fresh culture medium, and the cells were cultured for 12  
11 hours. SSCs were then infected for a third time. After overnight infection, the mixture  
12 was changed to fresh culture medium, and the cells were cultured at 37°C with 5%  
13 CO<sub>2</sub>. At day 6, the cells were subcultured at a 1:1–2 split ratio, and 100 ng/ml  
14 puromycin was added to the FGSC culture medium to screen for puromycin-resistant  
15 iGSCs. After 72 hours, the surviving iGSCs were passaged and analyzed by qRT-PCR  
16 and western blotting.

17 **RNA-seq library generation and data analysis.** Total RNA was extracted from  
18  $1\text{--}2 \times 10^6$  cells using Trizol Reagent. The RNA quality was assessed using an Agilent  
19 Bioanalyzer 2100. RNA-Seq libraries were prepared using the KAPA Stranded  
20 mRNA-Seq kit, following the manufacturer's instructions. After preparation, libraries  
21 were quantified using a Qubitfluorometer and sequenced with the HiSeq Platform  
22 ( $2 \times 100$  bp). All RNA-Seq data were trimmed and aligned to the mm9 reference  
23 genome using Hisat2 (version 4.8.2)<sup>40</sup> with the default parameters. Gene expression as  
24 FPKM was calculated by Cufflinks (version 2.2.1)<sup>41</sup> using the RefSeq database from  
25 the UCSC genome browser. Sequencing depth was normalized.

26 **GO term enrichment analysis.** GO term enrichment analysis was performed using  
27 the DAVID tool (version 6.8)<sup>42</sup>, focusing on enriched biological processes (BP). The  
28 GO results were displayed by Cytoscape (version 3.5.1)<sup>43</sup>. For the Benjamin-corrected  
29 P-value, a threshold of  $<0.05$  was used for significance.

1 **MeDIP-seq and bioinformatics.** The DNA methylome assay was performed as  
2 described previously<sup>44</sup>. Briefly, genomic DNA (gDNA) was extracted and fragmented  
3 with Bioruptor (Connecticut, USA) into fragment sizes of 200–500 bp. Sonicated  
4 gDNA was used for end-repair and adaptor ligation. The adaptor-ligated gDNA was  
5 denatured and incubated with an antibody (Epigentek, A-1014) conjugated on Protein  
6 A+G Magnetic beads (Millipore, 16-663). Immunoprecipitated DNA was amplified  
7 by PCR and subjected to Illumina sequencing.

8 MedIP and input raw sequencing reads were mapped using Bowtie2 (version  
9 2.2.6) to the UCSC mm10 genome reference<sup>36</sup>. Duplicate reads were removed by  
10 samtools (version: 1.6-1). The normalized coverage was calculated by binning the  
11 unique tags in 1 kb bins, and the number of reads in each bin was normalized using  
12 reads per kilobase per million reads (RPKM). We identified the enriched MeDIP  
13 regions over the background with MACS (version 2.1.1) and default parameters<sup>45</sup>.  
14 Genome-wide pairwise correlation analysis of read depth in 1 kb bins was performed  
15 to evaluate DNA methylation patterns of SSCs, iGSCs, and FGSCs.

16 **Ovarian organoid generation and culture.** Ovarian organoids were formed using a  
17 modified method described elsewhere<sup>46</sup>. Briefly, iGSCs, FGSCs (positive control),  
18 and SSCs (negative control) were purified by a FACS Aria II (BD Bioscience) and  
19 co-cultured with E12.5 female gonadal somatic cells in a 96-well U-bottom,  
20 low-binding culture plate (Thermo Fisher Scientific) for 2 days in GMEM  
21 supplemented with 15% Knockout serum replacement (Invitrogen), 1  $\mu$ M retinoic  
22 acid, 2 mM L-glutamine (Sigma), 1 mM non-essential amino acids (Life  
23 Technologies), 2 mM L-glutamine (Sigma), 30 mg/ml pyruvate (Amresco), 50  
24 mM  $\beta$ -mercaptoethanol (Biotech), 30 mg/l penicillin (Amresco), and 75 mg/l  
25 streptomycin (Amresco). One thousand iGSCs, FGSCs or SSCs were 3D co-cultured  
26 with  $3 \times 10^4$  gonadal somatic cells. The co-cultures from 96-well U-bottom,  
27 low-binding culture plates were transferred onto transwell-COL membranes (Coaster)  
28 soaked in  $\alpha$ -MEM- based medium,  $\alpha$ -MEM supplemented with 2% FBS, 2 mM  
29 L-glutamine, 150  $\mu$ M ascorbic acid (Sigma), 50 mM  $\beta$ -mercaptoethanol, 30  
30 mg/l penicillin, and 75 mg/l streptomycin. At 4 days of culture, the culture medium

1 was changed to StemPro-34-based medium, StemPro-34 SFM (Life Technologies)  
2 supplemented with 10% FBS, 2 mM L-glutamine, 150  $\mu$ M ascorbic acid, 50  
3 mM $\beta$ -mercaptoethanol, 30 mg/l penicillin, and 75 mg/l streptomycin. From 7 to 10  
4 days of culture, 600 nM ICI182780 was added to the StemPro-34-based medium. At  
5 11 days of culture, the culture medium was changed to StemPro-34-based medium  
6 without ICI182780. After 21 days of culture, individual follicles were manually  
7 dissociated using sharpened tungsten needles.

8 **Follicle 3D culture.** The single follicles were cultured on transwell-COL membranes  
9 with medium,  $\alpha$ -MEM supplemented with 5% FBS, 2% polyvinylpyrrolidone  
10 (Sigma), 2 mM L-glutamine, 150  $\mu$ M ascorbic acid, 50 mM $\beta$ -mercaptoethanol, 30  
11 mg/l penicillin, 75 mg/l streptomycin, 30 mg/ml pyruvate (Amresco), 0.1 IU/ml  
12 follicle-stimulating hormone (FSH; MSD), 15 ng /ml BMP15, and 15 ng/ml GDF9  
13 (R&D Systems). At 2 days of culture, the culture medium was changed to medium  
14 without BMP15 and GDF9, and then follicles were incubated in 0.1% Type IV  
15 Collagenase (Invitrogen) for 5 min. After washing with  $\alpha$ -MEM supplemented with  
16 5% FBS several times, the follicles were cultured in medium without BMP15 and  
17 GDF9. After 14 days of culture, cumulus-oocyte complexes grown on the membrane  
18 were picked up by a fine glass capillary.

19 **In vitro maturation, in vitro fertilization, and embryo transfer.** The  
20 cumulus-oocyte complexes were cultured with  $\alpha$ -MEM containing 5% FBS, 30 mg/ml  
21 pyruvate (Amresco), 0.1 IU /ml FSH, 4 ng/ml EGF, 1.2 IU/ml hCG (gonadotropin,  
22 ASKA), 4 ng/ml bFGF, 30 mg/l penicillin, 75 mg/l streptomycin. After 17-20 hours of  
23 culture, mature oocytes with expanded cumulus cells were fertilized in HTF medium  
24 (SAGE) by sperm. Embryos developed to the 2-cell stage were transferred into the  
25 oviducts of pseudopregnant females at 0.5 day post-coitum.

26

## 27 **Data Availability**

28 Original data of Hi-C have been deposited in the Gene Expression Omnibus database  
29 (accession number: 135104). Original data of RNA-Seq have been deposited in the



1 Gene Expression Omnibus database (accession number: 134727). Original data of  
2 MeDIP-Seq have been deposited in the Gene Expression Omnibus database  
3 (accession number: 134640). Original data of Microarrays have been deposited in the  
4 Gene Expression Omnibus database (accession number: GSE38776). All other  
5 relevant data are available from the corresponding author upon request.

6

- 7 21. Yoshimizu, T. *et al.* Germline-specific expression of the Oct-4/green fluorescent protein (GFP)  
8 transgene in mice. *Dev Growth Differ***41**, 675-684 (1999).
- 9 22. Reddy, P. *et al.* Oocyte-specific deletion of Pten causes premature activation of the primordial  
10 follicle pool. *Science***319**, 611-613 (2008).
- 11 23. Lan, Z. J., Xu, X. & Cooney, A. J. Differential oocyte-specific expression of Cre recombinase  
12 activity in GDF-9-iCre, Zp3cre, and Msx2Cre transgenic mice. *Biol Reprod***71**, 1469-1474 (2004).
- 13 24. Wu, J., Jester, W. F., Jr. & Orth, J. M. Short-type PB-cadherin promotes survival of gonocytes and  
14 activates JAK-STAT signalling. *Dev Biol***284**, 437-450 (2005).
- 15 25. Wu, J. *et al.* Short-type PB-cadherin promotes self-renewal of spermatogonial stem cells via  
16 multiple signaling pathways. *Cell Signal***20**, 1052-1060 (2008).
- 17 26. Yuan, Z., Hou, R. & Wu, J. Generation of mice by transplantation of an adult spermatogonial cell  
18 line after cryopreservation. *Cell Prolif***42**, 123-131 (2009).
- 19 27. Zou, K. *et al.* Production of offspring from a germline stem cell line derived from neonatal ovaries.  
20 *Nat Cell Biol***11**, 631-636 (2009).
- 21 28. Rohrborn, G. Frequencies of spontaneous non-disjunction in metaphase II. Oocytes of mice.  
22 *Humangenetik***16**, 123-125 (1972).
- 23 29. Eisen, M. B., Spellman, P. T., Brown, P. O. & Botstein, D. Cluster analysis and display of  
24 genome-wide expression patterns. *Proc Natl Acad Sci U S A***95**, 14863-14868 (1998).
- 25 30. Naumova, N. *et al.* Organization of the mitotic chromosome. *Science***342**, 948-953 (2013).
- 26 31. Huang, L., Ma, F., Chapman, A., Lu, S. & Xie, X. S. Single-Cell Whole-Genome Amplification and  
27 Sequencing: Methodology and Applications. *Annu Rev Genomics Hum Genet***16**, 79-102 (2015).
- 28 32. Diaz, N. *et al.* Chromatin conformation analysis of primary patient tissue using a low input Hi-C  
29 method. *Nat Commun***9**, 4938 (2018).
- 30 33. Ke, Y. *et al.* 3D Chromatin Structures of Mature Gametes and Structural Reprogramming during  
31 Mammalian Embryogenesis. *Cell***170**, 367-381 e320 (2017).
- 32 34. Rao, S. S. *et al.* A 3D map of the human genome at kilobase resolution reveals principles of  
33 chromatin looping. *Cell***159**, 1665-1680 (2014).
- 34 35. Servant, N. *et al.* HiC-Pro: an optimized and flexible pipeline for Hi-C data processing. *Genome*  
35 *Biol***16**, 259 (2015).
- 36 36. Langmead, B. & Salzberg, S. L. Fast gapped-read alignment with Bowtie 2. *Nat Methods***9**, 357-359  
37 (2012).
- 38 37. Imakaev, M. *et al.* Iterative correction of Hi-C data reveals hallmarks of chromosome organization.  
39 *Nat Methods***9**, 999-1003 (2012).
- 40 38. Servant, N. *et al.* HiTC: exploration of high-throughput 'C' experiments. *Bioinformatics***28**,  
41 2843-2844 (2012).

- 1 39. Dixon, J. R. *et al.* Chromatin architecture reorganization during stem cell differentiation. *Nature***518**,  
2 331-336 (2015).  
3 40. Pertea, M., Kim, D., Pertea, G. M., Leek, J. T. & Salzberg, S. L. Transcript-level expression analysis  
4 of RNA-seq experiments with HISAT, StringTie and Ballgown. *Nat Protoc***11**, 1650-1667 (2016).  
5 41. Trapnell, C. *et al.* Differential gene and transcript expression analysis of RNA-seq experiments with  
6 TopHat and Cufflinks. *Nat Protoc***7**, 562-578 (2012).  
7 42. Huang da, W., Sherman, B. T. & Lempicki, R. A. Systematic and integrative analysis of large gene  
8 lists using DAVID bioinformatics resources. *Nat Protoc***4**, 44-57 (2009).  
9 43. Su, G., Morris, J. H., Demchak, B. & Bader, G. D. Biological network exploration with Cytoscape 3.  
10 *Curr Protoc Bioinformatics***47**, 8 13 11-24 (2014).  
11 44. Zhang, X. L. *et al.* Integrative epigenomic analysis reveals unique epigenetic signatures involved in  
12 unipotency of mouse female germline stem cells. *Genome Biol***17**, 162 (2016).  
13 45. Zhang, Y. *et al.* Model-based analysis of ChIP-Seq (MACS). *Genome Biol***9**, R137 (2008).  
14 46. Hikabe, O. *et al.* Reconstitution in vitro of the entire cycle of the mouse female germ line.  
15 *Nature***539**, 299-303 (2016).

16  
17 **Acknowledgements** This work was supported by the National Key Research and  
18 Development Program of China (2018YFC1003501, 2017YFA0504201), National  
19 Nature Science Foundation of China (81720108017), the National Major Scientific  
20 Instruments and Equipment Development Project, National Nature Science  
21 Foundation of China (61827814).

22  
23 **Author contributions** H.L., X.L. and G.G.T. conducted all the major experiments,  
24 data analysis and wrote the manuscript; D.L. performed embryo transfer; C. H. carried  
25 out in situ Hi-C library generation using a low amount of cells; X.D. and W.X. were  
26 responsible for karyotype analysis; L.H, Y.Y., and H.W. were responsible for  
27 immunofluorescence and histological analysis of ovarian tissue; Q.L., A.J.C. and J.X.  
28 conducted Gdf9-Cre<sup>+</sup> and GFP transgenic mice study; X.Z. carried out MeDIP-seq and  
29 bioinformatics; J.W. initiated and supervised the entire project, conducted SSC and  
30 FGSC transplantation, analyzed data and wrote the manuscript.

31  
32 **Competing interests** The authors declare no competing interests.

33  
34 **Materials & Correspondence** Correspondence and requests for materials should be addressed to J.W.

35

1 **Figure legends**

2

3 **Fig. 1: SSCs transdifferentiate into oocytes in the ovaries of POF recipients and**  
4 **GFP-expressing offspring are generated from the transplanted SSCs from**  
5 **pou5f1/GFP transgenic mice. a, SSCs were transplanted into the ovaries of POF**  
6 recipient mice. I, II, Representative morphologies of the ovaries from recipients with  
7 (I) or without (II) SSC transplantations. III, Follicles containing GFP-positive (green)  
8 oocytes in recipient ovaries at 8 weeks after transplantation of pou5f1/GFP transgenic  
9 SSCs. IV, Oocytes in a wild-type ovary without a GFP signal. **b, DNA fluorescence *in***  
10 *situ* hybridization for SRY. SRY was only localized in oocytes (green) derived from  
11 SSCs in ovary (I). Nuclei were counterstained with DAPI (blue) (II). **c, Circos plot**  
12 showing the coverage from the single cell exon sequencing as a histogram. Grey  
13 represents FGSCs; Red represents GV oocytes derived from SSCs in the ovary; Blue  
14 represents SSCs. **d, Karyotype analysis of mature oocytes from POF recipient ovaries**  
15 at 2 months after pou5f1/GFP transgenic SSC transplantation. I, II, Representative  
16 morphologies of mature oocytes derived from pou5f1/GFP transgenic SSCs (I)  
17 emitting GFP fluorescence (II) under UV light. III–V, Cytogenetic analysis by G-band  
18 staining showing that some mature oocytes from SSCs had a karyotype of 20, Y. III:  
19 An example of 20, Y in mature oocytes derived from pou5f1/GFP transgenic SSCs.  
20 Arrow indicates the Y chromosome. IV: Example of 20, X in mature oocytes derived  
21 from pou5f1/GFP transgenic SSCs. V: Representative karyotype (20, X) of wild-type  
22 mature oocytes. VI, PCR analysis of *Sry*. M, 100 bp DNA marker; lane 1, SSCs; lane  
23 2, mature oocytes derived from pou5f1/GFP transgenic SSCs; lane 3, wild-type  
24 mature oocytes; lane 4, mock. **e, Example of offspring from POF recipient mice**  
25 transplanted with pou5f1/GFP transgenic SSCs (I) and an example of a Southern blot  
26 of tail DNA (II). Genomic DNA was digested with *EcoRI*. Marker sizes are indicated  
27 to the right of the blot. Lanes 1, 3, 5, and 7: transgenic mice; lanes 2, 4, 6, and 8:  
28 wild-type mice. **f, SLP analysis of parents and their offspring mice through SLP**  
29 markers. M: DNA marker; lane 1: donor SSCs; lane 2: female recipients (POF); lane 3:

1 mated males (C57BL/6); lanes 4–11: offspring from eight corresponding recipients  
2 females. Scale bars, 50  $\mu\text{m}$  (**a** I, III, IV), 100  $\mu\text{m}$  (**a** II), 25  $\mu\text{m}$  (**b** I, II), 10  $\mu\text{m}$  (**d** I,  
3 II).

4

5 **Fig. 2: Tracking of transplanted SSCs in recipient ovaries.** **a**, Transplanted SSCs  
6 from *pou5f1/GFP* transgenic mice were monitored by confocal laser scanning  
7 microscopy at 2 hours, and 2, 3, 4, 5, 6, 9, 12, and 15 days after transplantation into  
8 recipient ovaries. **b**, Gene expression dynamics during oogenesis in transplanted cells  
9 at 4, 6, 9, and 15 days after transplantation. **c**, Dual immunofluorescence analysis of  
10 MVH and GFP expression in transplanted cells at 2, 3, 4, 5, 6, 9, 12, and 15 days after  
11 transplantation. Scale bars, 50  $\mu\text{m}$ .

12

13 **Fig. 3: Reorganization of the chromosome structure during SSC conversion to**  
14 **iGSCs.** **a**, Contact matrices from chromosome 16 in SSCs, iGSCs, and FGSCs. **b**,  
15 First principal component (PC1) value and normalized Hi-C interaction heat maps at a  
16 40kb resolution in SSCs, iGSCs, and FGSCs. The PC1 value was used to indicate the  
17 A/B compartment status, where a positive PC1 value represents the A compartment  
18 (blue) and a negative value represents the B compartment (yellow). Dashed lines  
19 indicate TAD boundaries in SSCs. **c**, Hieratical clustering of PC1 values for the A/B  
20 compartment status in SSCs, iGSCs, and FGSCs. **d**, Expression of genes that changed  
21 compartment status (“A to B” or “B to A”) or remained the same (“stable”) compared  
22 with SSCs (P-value by Wilcoxon’s test). **e**, IGV snapshot of *Dppa3* (Stella) showing  
23 concordance between its expression and PC1 values. **f**, Relative MeDIP-seq signal  
24 that changed compartment status (“A to B” or “B to A”) or remained the same  
25 (“stable”) compared with SSCs (P-value by Wilcoxon’s test). \*\*\* $p < 0.0001$ .

26

27 **Fig. 4: Offspring production of ovarian organoids derived from iGSCs and**  
28 **FGSCs.** **a**, Ovarian organoid formation and development. Representative ovarian  
29 organoids with a merge of bright field and fluorescence. I–III, Ovarian organoids or  
30 co-cultures with somatic cells of gonad and iGSCs at 3 days (I), 2 weeks (II), and 3

1 weeks (III). IV–VI, Ovarian organoids or co-cultures with somatic cells of gonads and  
2 FGSCs at 3 days (IV), 2 weeks (V), and 3 weeks (VI). VII–IX, Images of aggregates  
3 formed by somatic cells of gonads and SSCs at 3 days (VII), 2 weeks (VIII), and 3  
4 weeks (IX). **b**, Follicle growth in vitro. I–III, VII, Representative follicles isolated  
5 from ovarian organoids formed by somatic cells of gonads and iGSCs at 0 days (I), 2  
6 days (II), 7 days (III), and 11 days (VII). IV–VI, VIII, Representative follicles isolated  
7 from ovarian organoids formed by somatic cells of gonads and FGSCs at 0 days (IV),  
8 2 days (V), 7 days (VI), and 11 days (VIII). IX, X, Cumulus-oocytes complexes  
9 derived from iGSCs (IX) and FGSCs (X) before in vitro maturation. **c**, Representative  
10 views of each stage of meiotic prophase I during ovarian organoid development after  
11 stained with anti-Sycp3 and -H2AX antibodies. **d**, Mature oocytes derived from  
12 iGSCs or FGSCs after in vitro maturation. **e**, Two-cell embryos derived from iGSCs  
13 or FGSCs after in vitro fertilization. **f**, Representative offspring derived from iGSCs  
14 or FGSCs. **g**, Offspring were identified by Southern blotting. Lanes 1–4, offspring  
15 derived from iGSCs, lane W, wild-type mice, lanes 5–8, offspring derived from  
16 FGSCs. **f**, Offspring were identified by fluorescence. Lanes 1–4, offspring derived  
17 from iGSCs, lane W, wild-type mice, lanes 5–8, offspring derived from FGSCs. Scale  
18 bars, 100  $\mu\text{m}$  (**a**), 20  $\mu\text{m}$  (**b** I–VI), 40  $\mu\text{m}$  (**b** VII–VIII), 50  $\mu\text{m}$  (**b** IX–X, **d**, **e**), 5  $\mu\text{m}$  (**c**).  
19  
20  
21

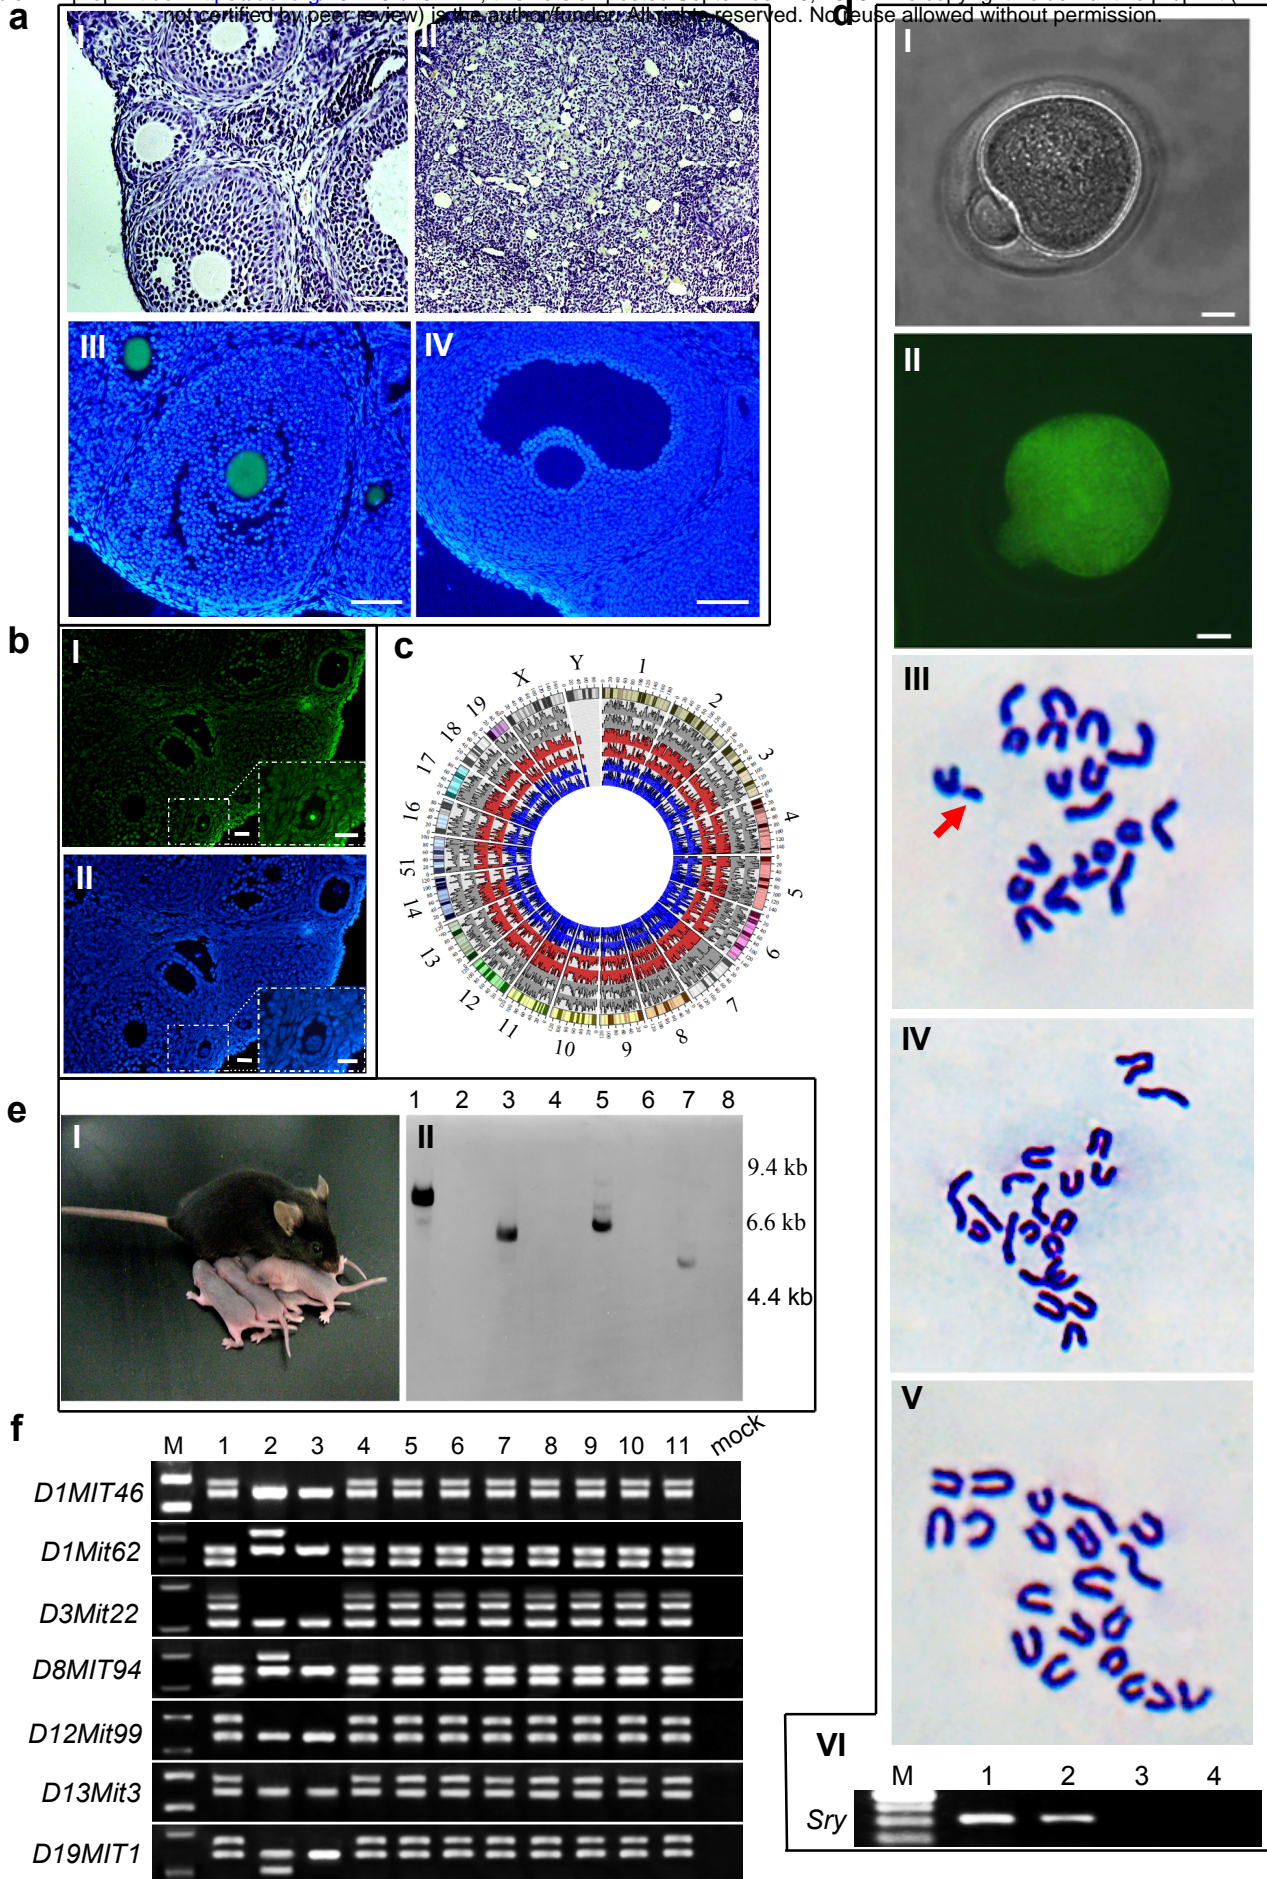

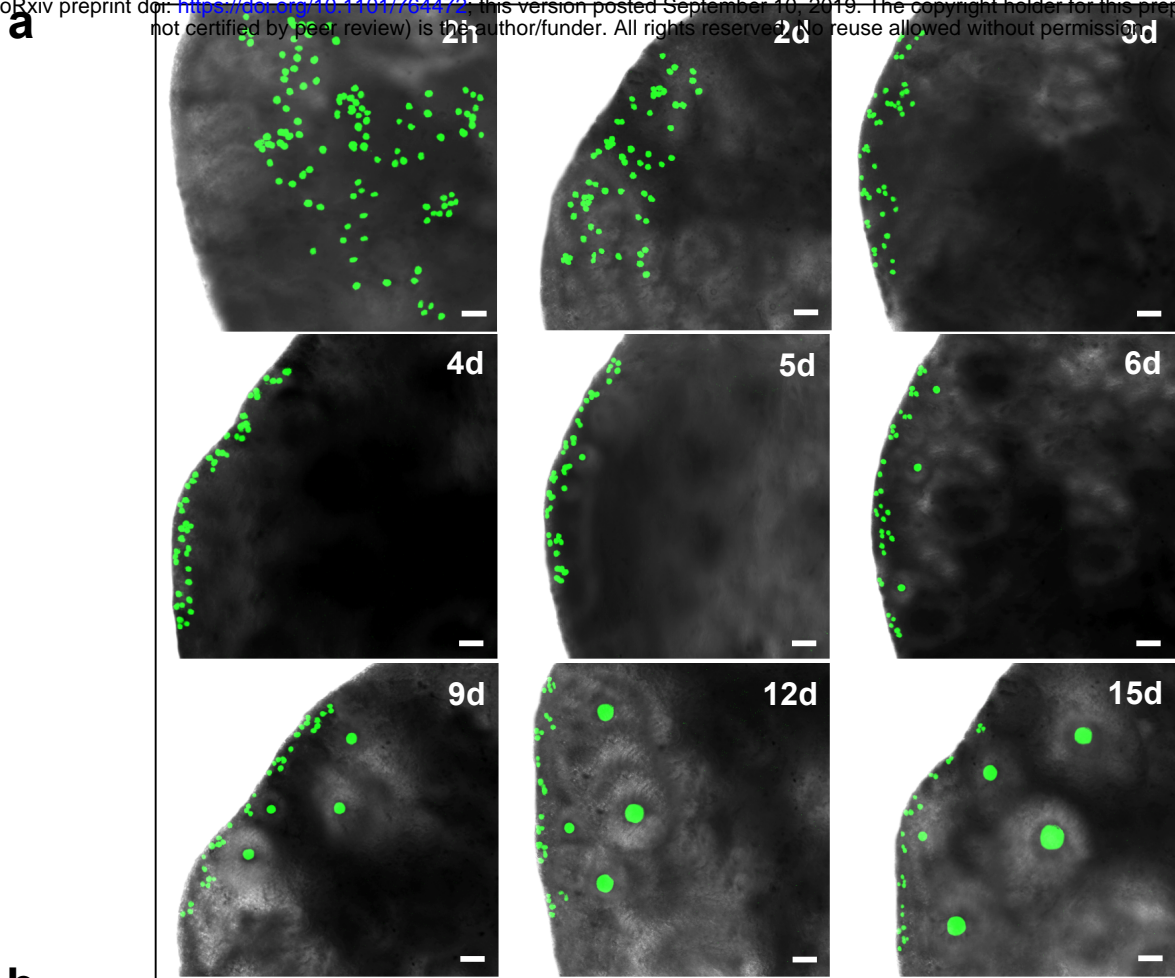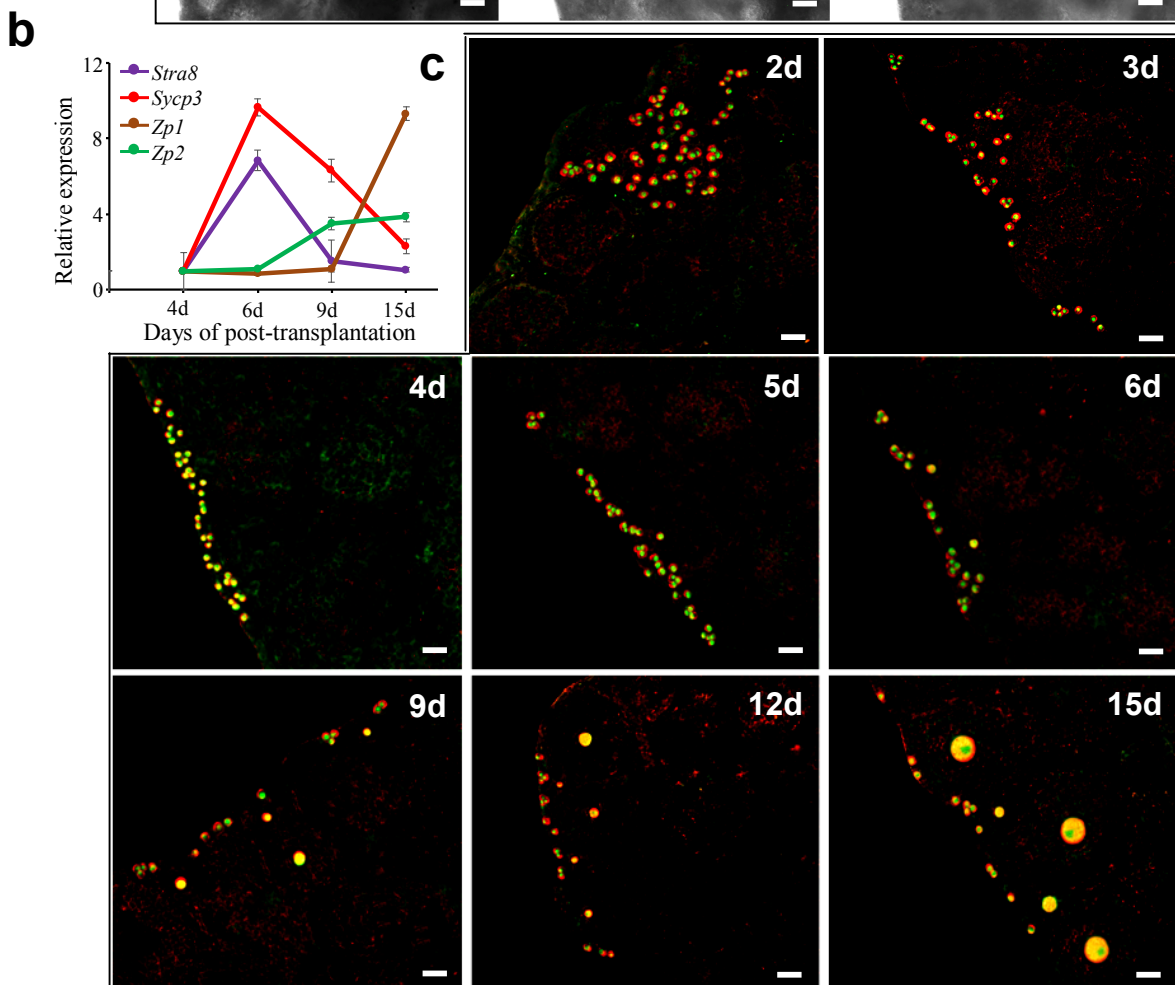

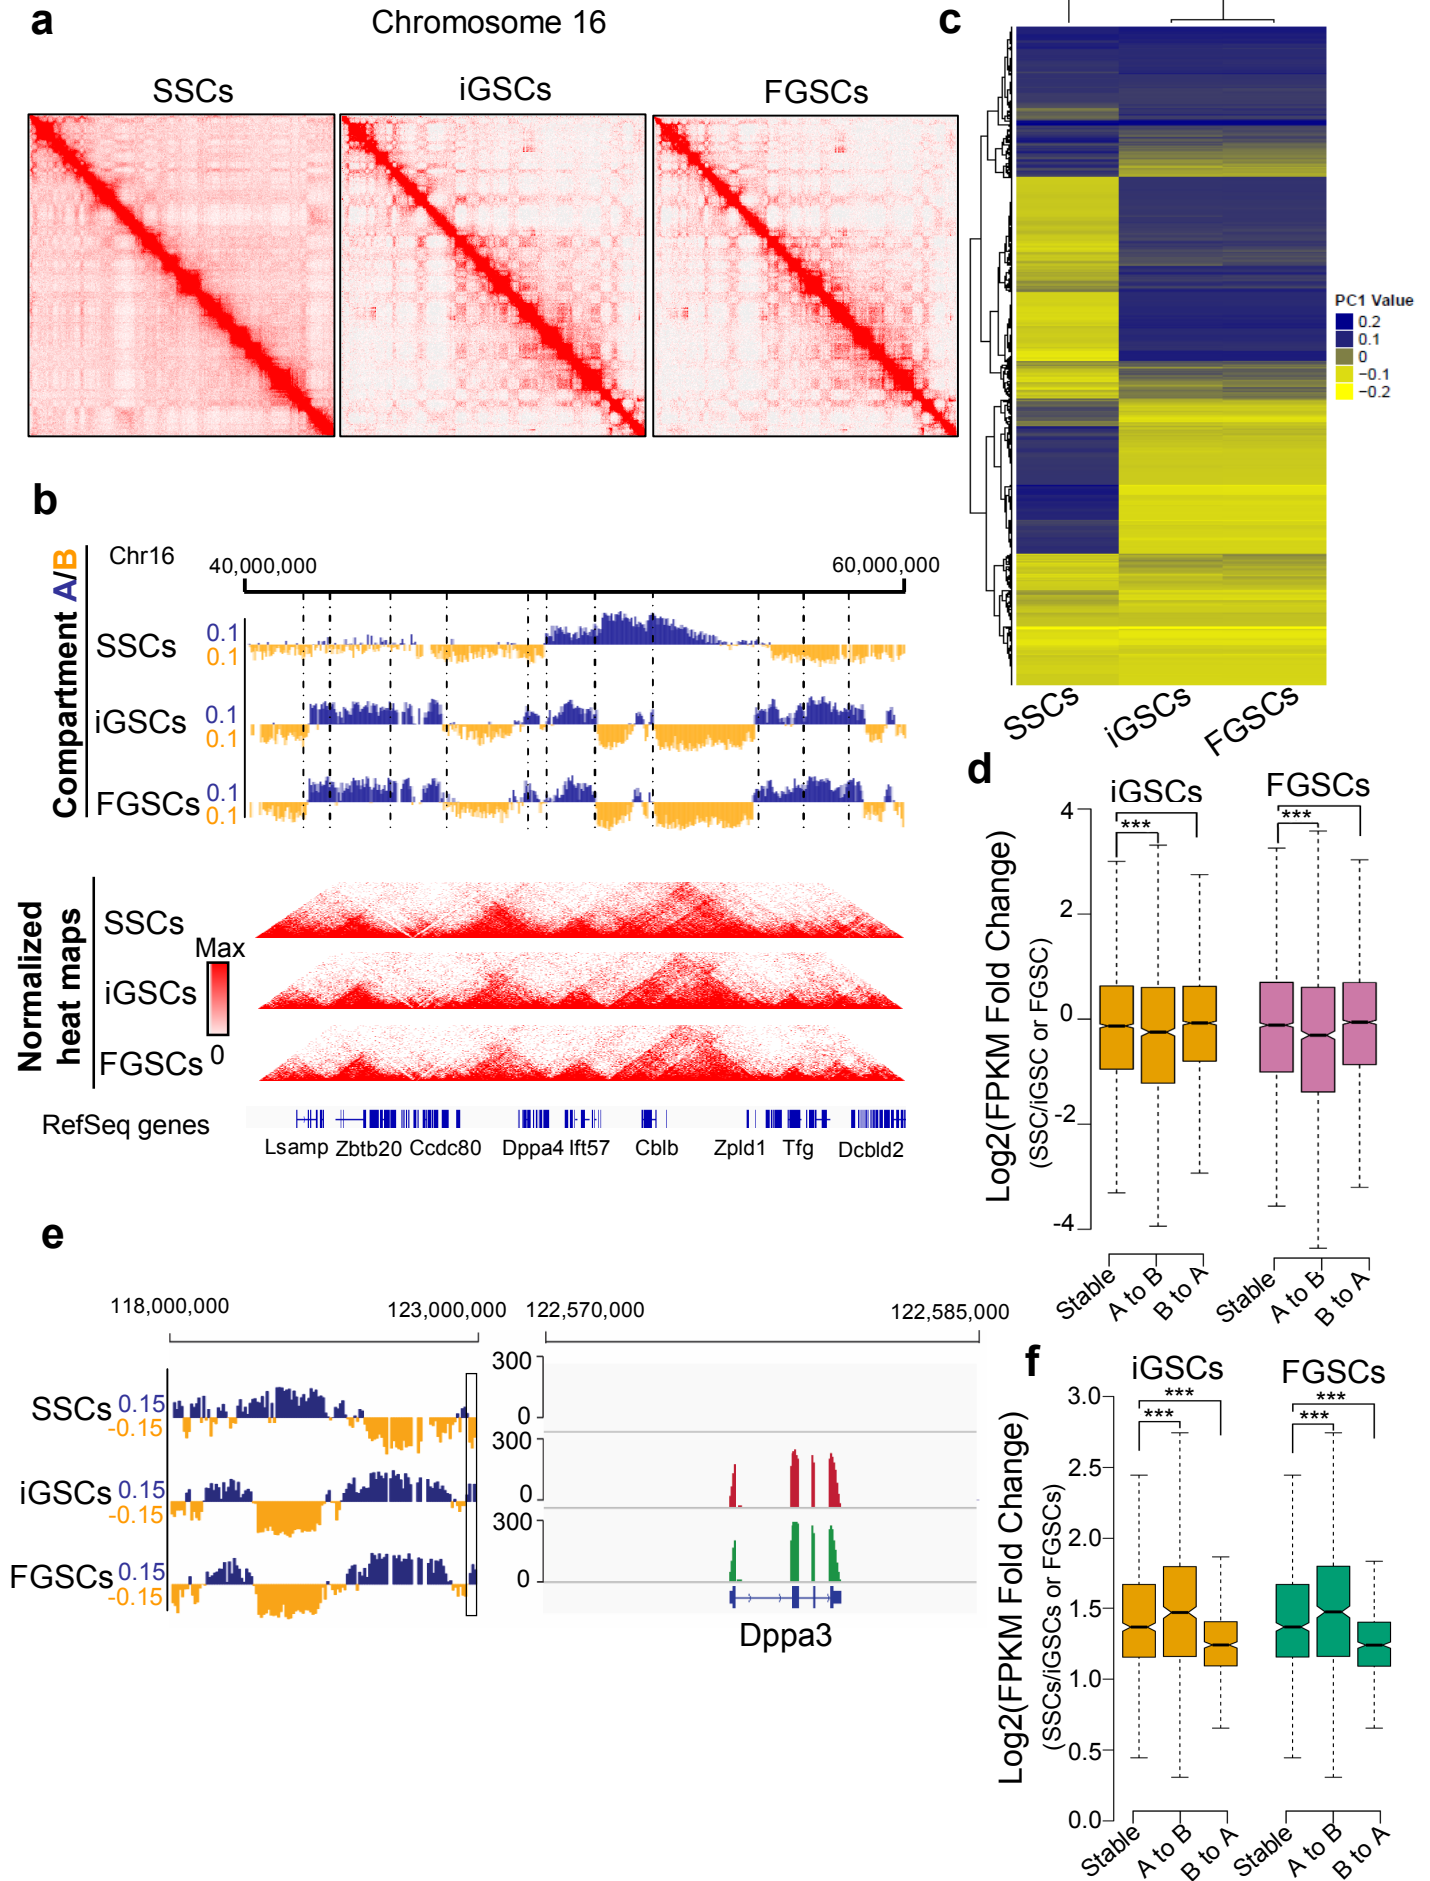



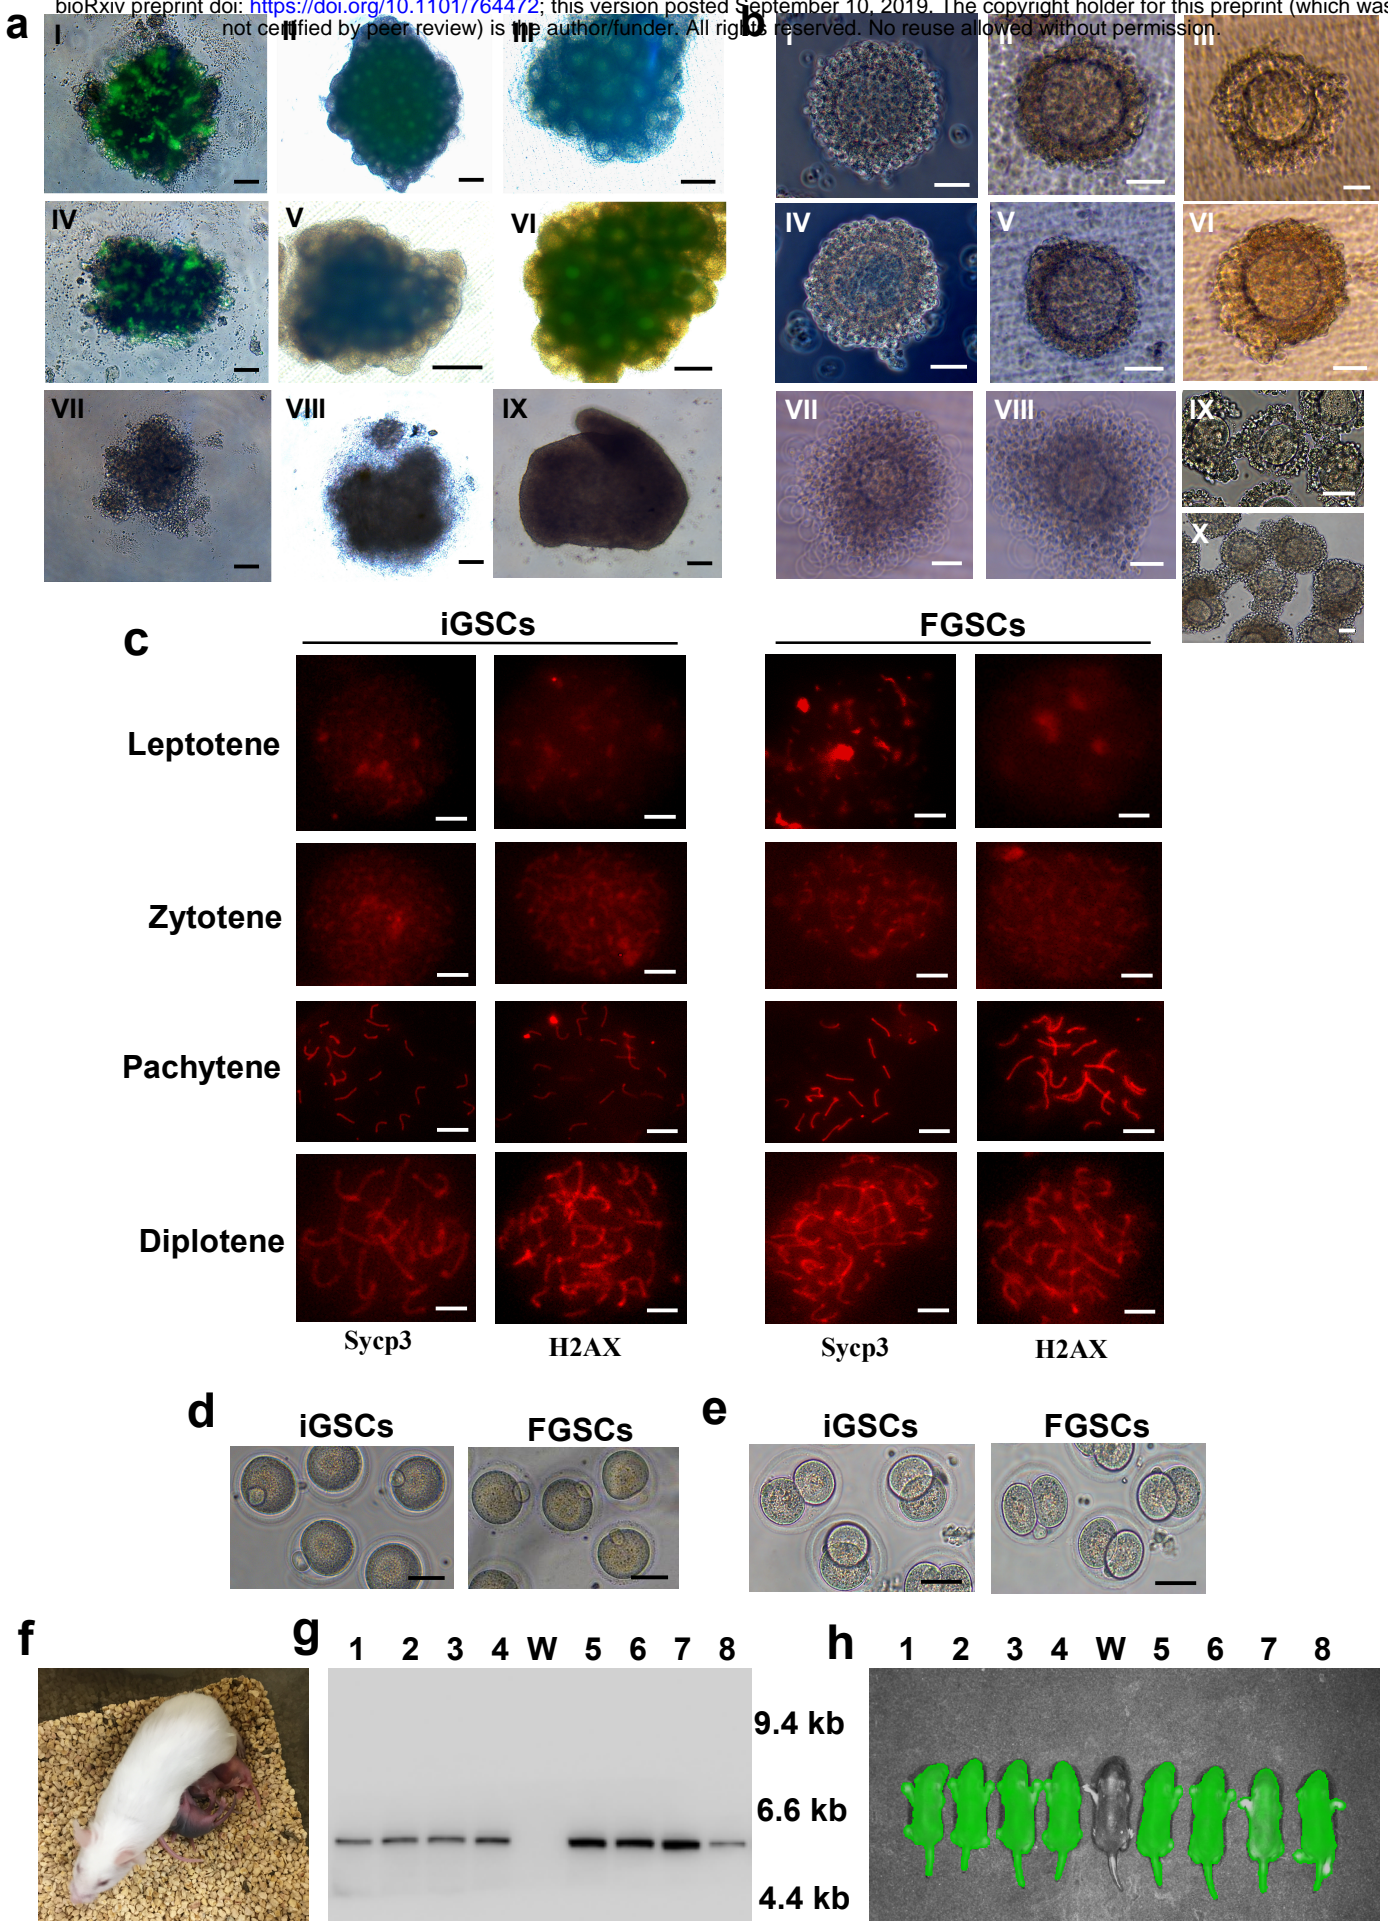

Source: https://www.biorxiv.org/content/10.1101/764472v1.full.pdf
