# Supplementary material for: Offspring production of ovarian organoids derived from spermatogonial stem cells by chromatin reorganization
Source: bioRxiv or medRxiv preprint supplement (doi:10.1101/764472), 2019-09-10

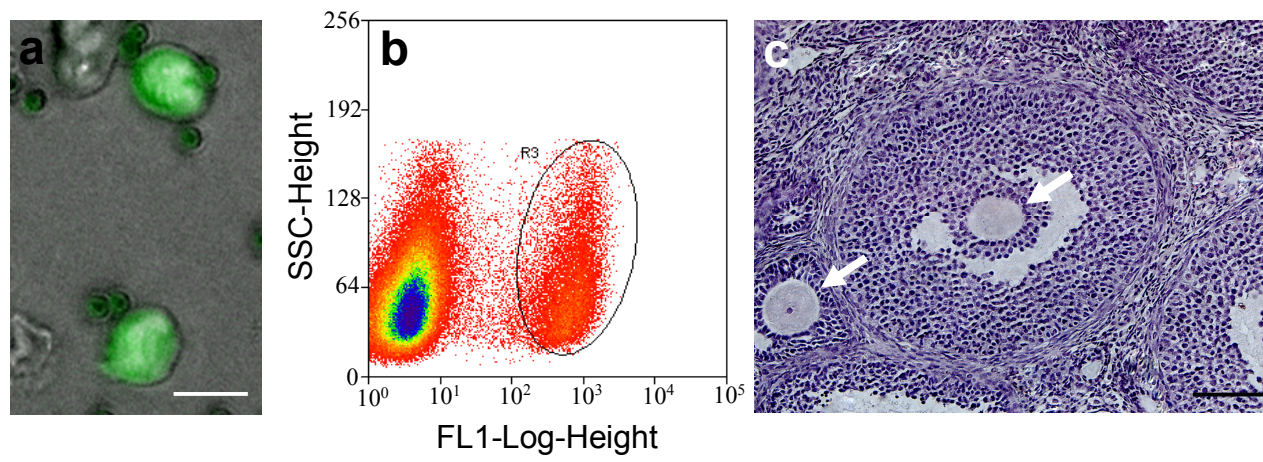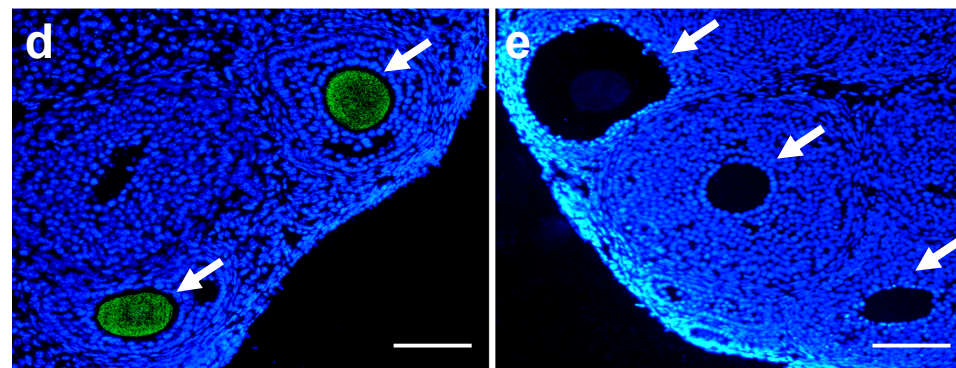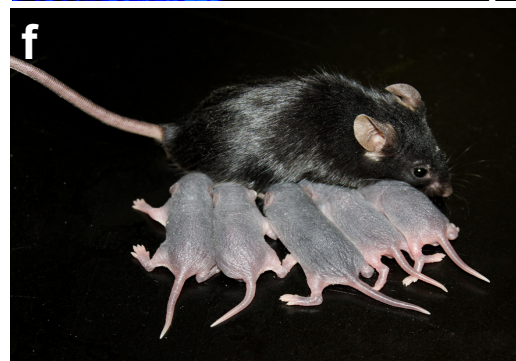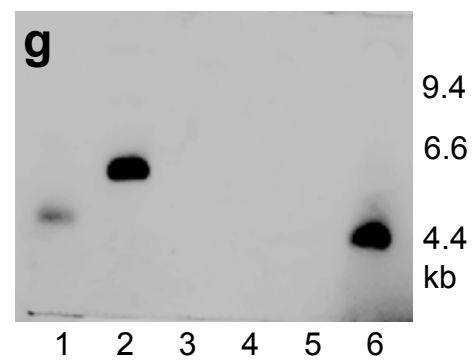

Supplement: Supplementary file [file media-3.pdf]
